# Supplementary material for: A surveillance study to determine the accuracy of mild traumatic brain injury diagnosis in an emergency department: protocol for a retrospective cohort study
Source: PubMed Central journal article supplement — BMJ Open. 2017 Aug 4;7(8):e016222. doi: 10.1136/bmjopen-2017-016222 (PMC5629740; doi:10.1136/bmjopen-2017-016222), 2017-08-04
Supplement: bmjopen-2017-016222.draft_revisions.pdf [file bmjopen-2017-016222.draft_revisions.pdf]

# BMJ Open

BMJ Open is committed to open peer review. As part of this commitment we make the peer review history of every article we publish publicly available.

When an article is published we post the peer reviewers' comments and the authors' responses online. We also post the versions of the paper that were used during peer review. These are the versions that the peer review comments apply to.

The versions of the paper that follow are the versions that were submitted during the peer review process. They are not the versions of record or the final published versions. They should not be cited or distributed as the published version of this manuscript.

BMJ Open is an open access journal and the full, final, typeset and author-corrected version of record of the manuscript is available on our site with no access controls, subscription charges or pay-per-view fees (<http://bmjopen.bmj.com>).

If you have any questions on BMJ Open's open peer review process please email [editorial.bmjopen@bmj.com](mailto:editorial.bmjopen@bmj.com)

# BMJ Open

## A surveillance study to determine the accuracy of mild traumatic brain injury diagnosis in an emergency department: protocol for a retrospective cohort study.

|                                 |                                                                                                                                                                                                                                                                                                                                                                                                                                                                                                                                                                                                     |
|---------------------------------|-----------------------------------------------------------------------------------------------------------------------------------------------------------------------------------------------------------------------------------------------------------------------------------------------------------------------------------------------------------------------------------------------------------------------------------------------------------------------------------------------------------------------------------------------------------------------------------------------------|
| Journal:                        | <i>BMJ Open</i>                                                                                                                                                                                                                                                                                                                                                                                                                                                                                                                                                                                     |
| Manuscript ID                   | bmjopen-2017-016222                                                                                                                                                                                                                                                                                                                                                                                                                                                                                                                                                                                 |
| Article Type:                   | Protocol                                                                                                                                                                                                                                                                                                                                                                                                                                                                                                                                                                                            |
| Date Submitted by the Author:   | 01-Feb-2017                                                                                                                                                                                                                                                                                                                                                                                                                                                                                                                                                                                         |
| Complete List of Authors:       | Pozzato, Ilaria; University of Sydney, Centre for Vision Research<br>Cameron, Ian; University of Sydney, Rehabilitation Studies Unit<br>Meares, Susanne; Macquarie University<br>Kifley, Annette; University of Sydney, Centre for Vision Research<br>Vu, Kim Van; University of Sydney, Centre for Vision Research<br>Liang, Anthony; University of Sydney, Centre for Vision Research<br>Gillett, Mark; University of Sydney, Rehabilitation Studies Unit<br>Craig, Ashley; University of Sydney, Northern Clinical School;<br>Gopinath, Bamini; University of Sydney, Centre for Vision Research |
| <b>Primary Subject Heading</b>: | Epidemiology                                                                                                                                                                                                                                                                                                                                                                                                                                                                                                                                                                                        |
| Secondary Subject Heading:      | Emergency medicine, Neurology, Public health                                                                                                                                                                                                                                                                                                                                                                                                                                                                                                                                                        |
| Keywords:                       | Neurological injury < NEUROLOGY, ACCIDENT & EMERGENCY MEDICINE, EPIDEMIOLOGY                                                                                                                                                                                                                                                                                                                                                                                                                                                                                                                        |
|                                 |                                                                                                                                                                                                                                                                                                                                                                                                                                                                                                                                                                                                     |

SCHOLARONE™  
Manuscripts

only

1  
2  
3 **A surveillance study to determine the accuracy of mild traumatic brain injury diagnosis**  
4  
5 **in an emergency department: protocol for a retrospective cohort study.**  
6  
7  
8

9 Ilaria Pozzato<sup>1</sup>

10 Ian D Cameron<sup>1</sup>

11 Susanne Meares<sup>2</sup>

12 Annette Kifley<sup>1</sup>

13 Kim Van Vu<sup>1</sup>

14 Anthony Liang<sup>1</sup>

15 Mark Gillett<sup>3</sup>

16 Ashley Craig<sup>1</sup>

17 Bamini Gopinath<sup>1</sup>

18  
19  
20  
21  
22  
23  
24  
25  
26  
27  
28  
29  
30  
31  
32  
33  
34  
35  
36  
37  
38  
39  
40  
41  
42  
43  
44  
45  
46  
47  
48  
49  
50  
51  
52  
53  
54  
55  
56  
57  
58  
59  
60

<sup>1</sup> John Walsh Centre for Rehabilitation Research, Sydney Medical School, Kolling Medical Research Institute, University of Sydney, Sydney, Australia.

<sup>2</sup> Department of Psychology, Macquarie University, Sydney, Australia.

<sup>3</sup> Emergency Department, Royal North Shore Hospital, Sydney, Australia.

Correspondence to:

Bamini Gopinath

John Walsh Centre for Rehabilitation Research, Kolling Institute

Corner Reserve Road & First Avenue, Royal North Shore Hospital

St Leonards, NSW 2065, Australia

Telephone: 61 2 9926 4995 Fax: 61 2 9926 4045

Email: [bamini.gopinath@sydney.edu.au](mailto:bamini.gopinath@sydney.edu.au)

Abstract: 300; Text: 3976; Figures: 1.

For peer review only

1  
2  
3  
4  
5  
6  
7  
8  
9  
10  
11  
12  
13  
14  
15  
16  
17  
18  
19  
20  
21  
22  
23  
24  
25  
26  
27  
28  
29  
30  
31  
32  
33  
34  
35  
36  
37  
38  
39  
40  
41  
42  
43  
44  
45  
46  
47  
48  
49  
50  
51  
52  
53  
54  
55  
56  
57  
58  
59  
60

**ABSTRACT**

**Introduction:** Published literature confirms that a mild traumatic brain injury (mTBI) may result in long-term emotional impacts and in vulnerable subgroups, cognitive deficits. The accurate diagnosis of mTBI and its written documentation is an important first step towards providing appropriate and timely clinical care. It is recommended that surveillance studies involving emergency department (ED) and hospital-based data be prioritized as these provide incident mTBI estimates. This project will advance existing research by quantifying the presence and accuracy of mTBI diagnoses through a comprehensive audit of ED records. The study aims to provide age-specific and sex-specific incidence rates of hospital presentations involving mTBI; and identify factors that are independently associated with documenting a positive mTBI diagnosis in ED.

**Methods and analysis:** Retrospective chart reviews (between June 2015 and June 2016) of electronic and subsequently clinical medical records from an ED in Sydney (New South Wales, Australia) will be conducted. The study population will include persons aged 18-65 years who presented to the ED with any diagnosis indicative of mTBI. The operational criteria for the clinical identification of mTBI cases is the presence of one or more of the following: a Glasgow Coma Scale (GCS) of  $\leq 15$  assessed at the scene; a GCS of 13-15 on presentation to hospital; duration of post-traumatic amnesia (PTA) for less than 24 hours; confusion or disorientation; a witnessed loss of consciousness for  $\leq 30$  minutes; and/or positive CT brain scan. We estimate a sample size of 500 cases will be identified during this 1-year period and that this will be large enough to provide acceptable accuracy around estimates of incidence and correlates associated with a positive mTBI diagnosis.

**Ethics and dissemination:** The study was approved by the Northern Sydney Local Health District ethics committee. Study findings will be disseminated via presentations at national/international conferences, and peer-reviewed journals.

### Strengths and limitations of this study

- Will provide previously unavailable epidemiological data on the number of patients who received an mTBI clinical diagnosis in the ED of a major metropolitan Australian hospital.
- Will provide a better understanding of the scope of mTBI by reporting accurate incidence rates and identifying limitations in the current diagnosis and/or documentation of mTBI in ED.
- Study findings may educate ED staff and/or improve clinical practice.
- The generalizability of the study's findings may be limited as mTBI cases treated by primary healthcare providers (e.g. general practitioners) or where medical attention was not sought will not be captured. This may contribute to an underestimation of mTBI incidence rates.

## INTRODUCTION

A World Health Organization (WHO) review of hospital treated mild traumatic brain injury (mTBI) reported an annual incidence in the range of 100–300/100 000.<sup>1</sup> Because most mTBI is not treated in hospital, the true population incidence of mTBI has been estimated to range between 600/100 000 and 749/100,000 per year.<sup>1,2</sup> Current literature reaffirms that mTBI may result in long-term emotional disorders,<sup>3-5</sup> and in vulnerable subgroups, cognitive deficits.<sup>6</sup> Mild TBI is now being recognized as a major health concern.<sup>7</sup> Common post-concussive symptoms associated with but not specific to mTBI are classified as physical (e.g. headache, blurring of vision), behavioral (e.g. irritability, anxiety) and cognitive (e.g. difficulty with memory).<sup>3</sup> Although post-concussive symptoms usually resolve within days or weeks, research literature indicates subjective reporting of physical, cognitive and emotional symptoms for several months or years post-injury.<sup>8-12</sup> Consequences for these individuals may include reduced functional ability, heightened emotional distress, and delayed return to work or school.<sup>13,5, 14</sup> However, early identification and subsequently early intervention such as through education and support for the guided resumption of activities, significantly reduces social morbidity and the severity of post-concussive symptoms.<sup>15</sup> The major limitation of research on mTBI – it is under-diagnosed and thus under-reported. Not knowing the true incidence and prevalence of mTBI renders it challenging to allocate resources and inform evidence-based health-care planning.<sup>3</sup>

Emergency department (ED) assessment is an important primary point of medical contact for early diagnosis; a key element in the management of mTBI for a significant number of patients.<sup>16-18</sup> However, the accurate clinical identification of patients with mTBI in ED is complicated by variations in the criteria used for diagnosis<sup>19-21</sup> and in diagnostic terminology.<sup>19, 22-24</sup> A prospective cohort study of all patients presenting to an urban academic ED in the US over 6 months,<sup>24</sup> showed that the identification of mTBI patients

1  
2  
3 using retrospectively assigned ICD-9 codes appeared to be inaccurate. These codes were  
4  
5 associated with a significant number of false-positive and false-negative code assignments.  
6  
7 Powell et al.<sup>22</sup> found that despite patients reporting findings that were consistent with an  
8  
9 mTBI diagnosis when interviewed by study personnel, the diagnosis of mTBI was frequently  
10  
11 absent from ED medical records. Instead, it appears that the ED staff focused on ruling out a  
12  
13 more severe brain injury for patients with a likely mechanism for TBI. This approach perhaps  
14  
15 reflected the primary mission of the ED to stabilize and treat serious injuries, as well as time  
16  
17 constraints inherent in ED practice. However, it means that those persons with no clear  
18  
19 clinical signs of mTBI on arrival at ED are more likely not to be diagnosed.<sup>22</sup>  
20  
21

22  
23 Moreover, Cassidy et al. reported that 24% of people injured in a motor vehicle crash  
24  
25 have a diagnosable mTBI,<sup>7</sup> and the authors concluded that mTBI is a major health concern in  
26  
27 the long-term.<sup>7</sup> Falls and motor vehicle crashes are the leading causes of TBI, however, the  
28  
29 true distribution of injury mechanisms for mTBI is not known. Given the lack of good-quality  
30  
31 published studies on mTBI following motor vehicle crashes, there is an obvious gap in  
32  
33 knowledge in this respect.<sup>3</sup> Unlike most fall-related mTBI, traffic injuries are complicated by  
34  
35 insurance issues, and the WHO Collaborating Centre Task Force on Mild Traumatic Brain  
36  
37 Injury has called for more studies in this setting.  
38  
39

40  
41 Currently there is limited empirical evidence as to whether persons with mTBI are  
42  
43 accurately identified and diagnosed in Australia ED records (including in the largest state of  
44  
45 New South Wales, NSW). The urgent need to establish a reliable surveillance system to  
46  
47 monitor and inform evidence-based health-care planning and effective treatment, prevention,  
48  
49 and rehabilitation strategies for mTBI have been repeatedly emphasized.<sup>2</sup> Hence, this  
50  
51 surveillance study will aim to move the research forward in this area. It will involve an  
52  
53 electronic and subsequently clinical record search using WHO diagnostic terms<sup>25</sup> and  
54  
55 secondary search terms (as previously used by Meares et al.<sup>26</sup>) to identify the number of  
56  
57  
58  
59  
60



1  
2  
3 patients with possible mTBI who were seen at an ED of a major Sydney metropolitan  
4  
5 hospital. The specific study objectives are: 1) To establish the rates of identified mTBI  
6  
7 (meeting WHO diagnostic and secondary search terms) and documented diagnosis in ED; and  
8  
9 provide age-specific and sex-specific incidence rates of hospital presentations involving  
10  
11 mTBI; 2) To determine the specific mTBI incidence rates by the mechanism of injury (i.e.  
12  
13 falls or motor vehicle crash); and 3) To identify the factors (e.g. age, sex, ethnicity, hospital  
14  
15 admission status) independently associated with documenting a positive mTBI diagnosis in  
16  
17 ED. The proposed study will bring us closer to understanding the scope of mTBI by reporting  
18  
19 accurate incidence rates and identifying limitations in current ED diagnosis/ documentation  
20  
21 and management (e.g. assessment, discharge instructions) of mTBI. Therefore, findings from  
22  
23 this study have the potential to improve long-term patient outcomes, inform the use of health  
24  
25 resources and promote management consistency for the mTBI patient population.  
26  
27  
28  
29  
30  
31

## 32 **METHODS**

### 33 **Sample selection**

34  
35 The proposed study will employ a retrospective surveillance system to determine if an mTBI  
36  
37 diagnosis was documented. The data source for this study will be all electronic and clinical  
38  
39 medical records that encompassed an ED stay at Royal North Shore Hospital (RNSH) in  
40  
41 metropolitan Sydney (NSW, Australia) over a 1-year period (between June 2015 and June  
42  
43 2016).  
44  
45  
46  
47  
48  
49

### 50 **Inclusion and exclusion criteria**

51  
52 The inclusion criteria is persons aged 18-65 years who presented to the ED within 24 hours  
53  
54 post- injury with any diagnosis indicative of mTBI<sup>27</sup> (using search terms based on the WHO  
55  
56 criteria for mTBI<sup>22, 25</sup>): 1) a Glasgow Coma Scale (GCS) of 15 or below at the scene; 2) a  
57  
58  
59  
60

1  
2  
3 GCS of 13-15 on presentation to hospital; 3) a duration of post-traumatic amnesia (PTA) of  
4 less than 24 hours; 4) confusion or disorientation; 5) a witnessed loss of consciousness for 30  
5 minutes or less; and/or 6) positive CT brain scan, indicating intracranial injuries not  
6 requiring neurosurgery.<sup>2, 25, 28</sup> The exclusion criteria includes: penetrating brain injury;  
7 moderate/ severe TBI, spinal cord injury, and pre-existing cognitive impairment.<sup>22, 26</sup> Any  
8 person with head trauma, who does not meet the WHO criteria, but who: 1) is assessed for  
9 PTA and obtains optimal scores on the Abbreviated Westmead Post-traumatic Amnesia Scale  
10 (A-WPTAS);<sup>18</sup> or 2) presents to the ED for post-concussive symptoms,<sup>29</sup> transient  
11 neurological deficits or queried loss of consciousness will be classified as indeterminate  
12 mTBI. Although the literature<sup>27</sup> suggests that a diagnosis of mTBI should not be based only  
13 on post-injury symptoms, these cases may nevertheless reflect the difficulty in obtaining  
14 accurate diagnostic information (i.e. WHO criteria) from ED records, or the mildest injuries,  
15 where manifestations of mTBI resolve prior to the arrival of the medical personnel or  
16 presentation to hospital.<sup>26</sup> Indeed, these cases are the most difficult to identify.

### 36 Patient screening and data collection

37  
38 A mTBI case identification protocol (with input from all investigators) was developed and  
39 the chart auditors (IP and KVV) were trained with the aim of maximizing consistency in the  
40 identification of mTBI cases, for which inter-rater reliability will be assessed. Patient  
41 information will be extracted by the research team from the information management system,  
42 FirstNet, a module of the Health Electronic Medical Record that is used in NSW (Figure 1).  
43 A limitation of FirstNet is that only a principal diagnosis can be recorded and guidelines are  
44 not explicit on whether symptoms or a diagnosis is to be entered.<sup>30</sup> If mTBI is the diagnosis  
45 of interest, and the patient is not categorized accordingly they will not be identified through  
46 FirstNet. To increase the accuracy of identifying possible mTBI patients, ED presentations

1  
2  
3 will be reviewed by a two-step process (Figure 1). Individuals with possible head trauma, will  
4  
5 be first identified by the research team, based on discharge diagnosis and triage presenting  
6  
7 information available electronically, indicating the following: 1) a diagnosis of head trauma,  
8  
9 head injury or brain injury; 2) a mechanism of injury consistent with a possible mTBI  
10  
11 (transport-related accident, assault, or fall); 3) an injury description that includes head  
12  
13 lacerations, bruising, swelling, facial fractures, or other musculoskeletal injuries; and 4)  
14  
15 mTBI-related symptoms, such as pain, neurological or behavioral symptoms. Cases will be  
16  
17 excluded if the mechanism of injury is not consistent with mTBI or if the trauma does not  
18  
19 involve an impact to the head.  
20  
21

22  
23 Second, clinical records will be examined to confirm if individuals meet the diagnostic  
24  
25 criteria and to document alcohol and illicit drug usage at the time of injury.<sup>18, 22, 26</sup> The audit  
26  
27 of ED records will help obtain information (if available) regarding GCS scores, with mTBI  
28  
29 defined as a GCS score of 13-15 on hospital admission. Information from the A-WPTAS, a  
30  
31 valid measure of PTA, will be collected. This scale includes the eye opening and motor  
32  
33 components, and the 5 verbal orientation items from the GCS and 3 picture cards to measure  
34  
35 amnesia.<sup>18</sup> Other measures of mTBI, which will be collected to determine whether an  
36  
37 accurate mTBI diagnosis was made in the ED, include: documented GCS of <15 at the scene;  
38  
39 signs of confusion or disorientation; a witnessed loss of consciousness of 30 minutes or less;  
40  
41 a diagnosis of head trauma, head injury or brain injury; and investigation reports from brain  
42  
43 CT scan, facial or skull X-Ray.  
44  
45  
46

47  
48 When the criteria of any of the above are unclear for the chart auditors, all clinical  
49  
50 evidence will be referred to and reviewed by the study investigators (BG, SM) on a weekly  
51  
52 basis. The data will be collected using data collection sheets, and will be subsequently  
53  
54 entered into a secure online platform, called Research Electronic Data Capture (REDCap).  
55  
56  
57

1  
2  
3 The proposed retrospective surveillance system will also allow us to obtain socio-  
4 demographic data from the electronic records of confirmed mTBI cases, and these variables  
5 will include: postcode, age, sex, and ethnicity. An audit of all medical records that encompass  
6 patient's ED stay will allow us to obtain information on the date of injury and the  
7 mechanisms of injury (e.g. motor vehicle crash, falls, sports-related).  
8  
9

10  
11 Further, for the purpose of this study, mTBI-related diagnoses (i.e. brain injury,  
12 concussion, post-concussion syndrome) listed in the ED medical records and the assigned  
13 diagnostic codes will be collected through retrospective review to determine whether an  
14 mTBI clinical diagnosis is documented or not.  
15  
16  
17  
18  
19  
20  
21  
22  
23

### 24 **Sample size**

25  
26 A 1-year audit of clinical and electronic ED records from RNSH will achieve reasonable  
27 numbers. We base this assumption on a previous study by Meares (data not published), which  
28 showed that annual patient presentations to another major NSW ED in 2010 were 54473 and  
29 increased in 2011 to 56903. An audit of electronic and clinical medical records indicated that  
30 between April and September 2010, there were 19,084 attendances of individuals aged  
31 between 18 to 65 years of age, and between April and September, 2011 there were 20,024  
32 attendances. The proportion identified with mTBI was 1.1% (n = 228) between April and  
33 September 2010, and between April and September 2011 were 1.3% (n = 252). Hence, in this  
34 study, we estimate that around 500 mTBI positive cases will be documented in ED medical  
35 records over a 1-year period. We expect that this sample size will be large enough to provide  
36 accuracy around estimates of incidence and correlates associated with a positive mTBI  
37 diagnosis.  
38  
39  
40  
41  
42  
43  
44  
45  
46  
47  
48  
49  
50  
51  
52

### 53 **Outcomes**

1  
2  
3 The primary outcome is the rate of positive mTBI diagnosis or the annual mTBI incidence  
4 determined from ED records. Secondary outcomes are: 1) specific mTBI incidence rates  
5 among people who have had a motor vehicle crash versus those injured in a fall or sports-  
6 related incident; and 2) specific factors (e.g. age, sex, ethnicity, hospital admission status)  
7 independently associated with documenting a positive mTBI diagnosis in the ED.  
8  
9  
10  
11  
12  
13

### 14 15 16 **Data analysis plan**

17 Demographic and clinical data will be summarized using means and standard deviations for  
18 continuous variables and frequencies or percentages for categorical variables. While FirstNet  
19 allows possible mTBI cases to be identified in the first instance, an audit of hospital records  
20 will allow for an identification of mTBI based on meeting  $\geq 1$  of WHO criteria, and/or  
21 secondary criteria; this is considered a gold standard approach. We will compare those cases  
22 identified as an mTBI through retrospective audit with the accuracy of an ED working  
23 diagnosis, which is entered by clinicians in Systematized Nomenclature of Medicine -  
24 Clinical Terms or SNOMED CT (used within hospital electronic medical records). Further,  
25 the ICD diagnoses for in-patient admissions of mTBI will also be compared in separate  
26 analyses. The statistical comparison between these different sources to calculate agreement or  
27 amount of misclassification will be achieved using kappa statistics.  
28  
29  
30  
31  
32  
33  
34  
35  
36  
37  
38  
39  
40  
41  
42

43 We will calculate age- and sex-specific incidence rates of mTBI over the 1-year period.  
44 95% confidence intervals using Fisher's exact test will be calculated for the incidence rate.  
45 The odds of receiving an mTBI diagnosis in the ED will be determined using multivariable  
46 logistic regression analyses. Potential confounders to be assessed will include: age, sex,  
47 ethnicity, date of injury, and mechanism of injury. A level of  $p < 0.05$  will be considered  
48 statistically significant. We will use SPSS and/or SAS programs for data analyses.  
49  
50  
51  
52  
53  
54  
55  
56  
57  
58  
59  
60

## ETHICS AND DISSEMINATION

The study was approved by the Northern Sydney Local Health District Human Research Ethics Committee. The committee deemed this study as low risk in terms of ethical issues. The written papers from this study will be submitted for publication in quality peer-reviewed medical and health journals. Study findings will also be disseminated via presentations at local, national and international conferences.

**Contributors:** The authors' responsibilities were as follows—BG, IP, IDC, SM, AC, MG, and AK: study concept and design; IP, KVV, and AL: acquisition of data; BG, IP: drafting of the manuscript; IP, BG, IDC, SM, AC, and KVV: critical revision of the manuscript. All authors have given final approval of the version to be published.

**Funding:** The study is supported by the Ramsay Research and Teaching Fund. IDC is funded by an Australian National Health and Medical Research Council Practitioner Fellowship.

**Competing interests:** None declared.

**Ethics and dissemination:** The Northern Sydney Local Health District Human Research Ethics Committee approved the study (reference: RESP/16/259). Findings will be disseminated through research conferences and peer-reviewed journals.

**Data sharing statement:** Study data will be available on request to BG once the research team has completed the pre-planned analyses.

## REFERENCES

1. Cassidy JD, Carroll LJ, Peloso PM, et al. Incidence, risk factors and prevention of mild traumatic brain injury: Results of the WHO Collaborating Centre Task Force on Mild Traumatic Brain Injury. *J. Rehabil. Med.* Feb 2004;36:28-60.

- 1  
2  
3 2. Feigin VL, Theadom A, Barker-Collo S, et al. Incidence of traumatic brain injury in  
4  
5 New Zealand: a population-based study. *The Lancet. Neurology*. Jan 2013;12(1):53-  
6  
7 64.
- 8  
9  
10 3. Jagnoor J, Cameron I. Mild traumatic brain injury and motor vehicle crashes:  
11  
12 Limitations to our understanding. *Injury*. (0).
- 13  
14 4. Stalnacke BM, Elgh E, Sojka P. One-year follow-up of mild traumatic brain injury:  
15  
16 Cognition disability and life satisfaction of patients seeking consultation. *J. Rehabil.*  
17  
18 *Med*. 2007;39(5):405-411.
- 19  
20  
21 5. Craig A, Tran Y, Guest R, et al. Psychological impact of injuries sustained in motor  
22  
23 vehicle crashes: systematic review and meta-analysis. *BMJ open*. Sep 08  
24  
25 2016;6(9):e011993.
- 26  
27  
28 6. Karr JE, Areshenkoff CN, Garcia-Barrera MA. The neuropsychological outcomes of  
29  
30 concussion: a systematic review of meta-analyses on the cognitive sequelae of mild  
31  
32 traumatic brain injury. *Neuropsychology*. May 2014;28(3):321-336.
- 33  
34  
35 7. Cassidy JD, Boyle E, Carroll LJ. Population-based, inception cohort study of the  
36  
37 incidence, course, and prognosis of mild traumatic brain injury after motor vehicle  
38  
39 collisions. *Archives of physical medicine and rehabilitation*. Mar 2014;95(3  
40  
41 Suppl):S278-285.
- 42  
43  
44 8. Mittenberg W, Canyock EM, Condit D, Patton C. Treatment of post-concussion  
45  
46 syndrome following mild head injury. *Journal of clinical and experimental*  
47  
48 *neuropsychology*. Dec 2001;23(6):829-836.
- 49  
50  
51 9. Stalnacke BM, Bjornstig U, Karlsson K, Sojka P. One-year follow-up of mild  
52  
53 traumatic brain injury: post-concussion symptoms, disabilities and life satisfaction in  
54  
55 relation to serum levels of S-100B and neurone-specific enolase in acute phase. *J*  
56  
57 *Rehabil Med*. Sep 2005;37(5):300-305.

- 1  
2  
3 10. De Kruijk JR, Leffers P, Menheere PP, Meerhoff S, Rutten J, Twijnstra A. Prediction  
4 of post-traumatic complaints after mild traumatic brain injury: early symptoms and  
5 biochemical markers. *Journal of neurology, neurosurgery, and psychiatry*. Dec  
6 2002;73(6):727-732.  
7
- 8  
9  
10  
11 11. Sterr A, Herron KA, Hayward C, Montaldi D. Are mild head injuries as mild as we  
12 think? Neurobehavioral concomitants of chronic post-concussion syndrome. *BMC*  
13 *neurology*. 2006;6:7.  
14
- 15  
16  
17  
18 12. Silverberg ND, Gardner AJ, Brubacher JR, Panenka WJ, Li JJ, Iverson GL.  
19 Systematic review of multivariable prognostic models for mild traumatic brain injury.  
20 *Journal of neurotrauma*. Apr 15 2015;32(8):517-526.  
21
- 22  
23  
24  
25 13. NSW) MAAoNM. *Guidelines for Mild Traumatic Brain Injury following a Closed*  
26 *Head Injury* 2008.  
27
- 28  
29  
30  
31 14. Jagoda AS, Bazarian JJ, Bruns JJ, Jr., et al. Clinical policy: neuroimaging and  
32 decisionmaking in adult mild traumatic brain injury in the acute setting. *Annals of*  
33 *emergency medicine*. Dec 2008;52(6):714-748.  
34
- 35  
36  
37  
38 15. Dikmen S, McLean A, Temkin N. Neuropsychological and psychosocial  
39 consequences of minor head injury. *Journal of Neurology, Neurosurgery &*  
40 *Psychiatry*. November 1, 1986 1986;49(11):1227-1232.  
41
- 42  
43  
44  
45 16. Bazarian J, Hartman M, Delahunta E. Minor head injury: predicting follow-up after  
46 discharge from the Emergency Department. *Brain Injury*. Mar 2000;14(3):285-294.  
47
- 48  
49  
50  
51 17. Bazarian JJ, McClung J, Cheng YT, Flesher W, Schneider SM. Emergency  
52 department management of mild traumatic brain injury in the USA. *Emerg. Med. J.*  
53 Jul 2005;22(7):473-477.  
54
- 55  
56  
57  
58 18. Meares S, Shores EA, Taylor AJ, Lammél A, Batchelor J. Validation of the  
59 Abbreviated Westmead Post-traumatic Amnesia Scale: A brief measure to identify  
60



- 1  
2  
3 acute cognitive impairment in mild traumatic brain injury. *Brain Injury*.  
4  
5 2011;25(12):1198-1205.  
6  
7  
8 19. Blostein P, Jones SJ. Identification and evaluation of patients with mild traumatic  
9  
10 brain injury: Results of a national survey of level I trauma centers. *Journal of Trauma*  
11  
12 - *Injury, Infection and Critical Care*. 2003;55(3):450-453.  
13  
14 20. Ruff RM, Jurica P. In search of a unified definition for mild traumatic brain injury.  
15  
16 *Brain Injury*. 1999;13(12):943-952.  
17  
18 21. Esselman PC, Uomoto JM. Classification of the spectrum of mild traumatic brain  
19  
20 injury. *Brain Injury*. 1995;9(4):417-424.  
21  
22  
23 22. Powell JM, Ferraro JV, Dikmen SS, Temkin NR, Bell KR. Accuracy of mild  
24  
25 traumatic brain injury diagnosis. *Archives of physical medicine and rehabilitation*.  
26  
27 Aug 2008;89(8):1550-1555.  
28  
29  
30 23. Tellier A, Della Malva LC, Cwinn A, Grahovac S, Morrish W, Brennan-Barnes M.  
31  
32 Mild head injury: A misnomer. *Brain Injury*. 1999;13(7):463-475.  
33  
34 24. Bazarian JJ, Veazie P, Mookerjee S, Lerner EB. Accuracy of Mild Traumatic Brain  
35  
36 Injury Case Ascertainment Using ICD-9 Codes. *Academic Emergency Medicine*.  
37  
38 2006;13(1):31-38.  
39  
40  
41 25. Carroll LJ, Cassidy JD, Holm L, Kraus J, Coronado VG. Methodological issues and  
42  
43 research recommendations for mild traumatic brain injury: The WHO Collaborating  
44  
45 Centre Task Force on Mild Traumatic Brain Injury. *J. Rehabil. Med.* Feb  
46  
47 2004;36:113-125.  
48  
49  
50 26. Meares S, Shores EA, Smyth T, Batchelor J, Murphy M, Vukasovic M. Identifying  
51  
52 Posttraumatic Amnesia in Individuals With a Glasgow Coma Scale of 15 After Mild  
53  
54 Traumatic Brain Injury. *Archives of physical medicine and rehabilitation*. Jan 7 2015.  
55  
56  
57  
58  
59  
60

- 1  
2  
3 27. Ruff RM, Iverson GL, Barth JT, Bush SS, Broshek DK. Recommendations for  
4  
5 diagnosing a mild traumatic brain injury: a National Academy of Neuropsychology  
6  
7 education paper. *Archives of clinical neuropsychology : the official journal of the*  
8  
9 *National Academy of Neuropsychologists*. Feb 2009;24(1):3-10.  
10  
11  
12 28. Carroll LJ, Cassidy JD, Peloso PM, et al. Prognosis for mild traumatic brain injury:  
13  
14 results of the WHO Collaborating Centre Task Force on Mild Traumatic Brain Injury.  
15  
16 *J Rehabil Med*. Feb 2004(43 Suppl):84-105.  
17  
18 29. Hoffer ME, Szczupak M, Kiderman A, et al. Neurosensory Symptom Complexes after  
19  
20 Acute Mild Traumatic Brain Injury. *PloS one*. 2016;11(1):e0146039.  
21  
22  
23 30. Liaw ST, Chen HY, Maneze D, Taggart J, Dennis S, Vagholkar S, Bunker J. The  
24  
25 Quality of Routinely Collected Data: Using the "Principal Diagnosis" in Emergency  
26  
27 Department Databases as an Example. *Electro J Health Info* 2012;7:e1.  
28  
29  
30  
31  
32  
33  
34  
35  
36  
37  
38  
39  
40  
41  
42  
43  
44  
45  
46  
47  
48  
49  
50  
51  
52  
53  
54  
55  
56  
57  
58  
59  
60

1  
2  
3  
4  
5  
6  
7  
8  
9  
10  
11  
12  
13  
14  
15  
16  
17  
18  
19  
20  
21  
22  
23  
24  
25  
26  
27  
28  
29  
30  
31  
32  
33  
34  
35  
36  
37  
38  
39  
40  
41  
42  
43  
44  
45  
46  
47  
48  
49

**FIGURE 1.** Screening and data collection flow chart. Grey boxes indicate study selection process for identification of mTBI.

ED: Emergency Department; TBI: Traumatic Brain Injury; SCI: Spinal Cord Injury; MVA: Motor Vehicle Accident; GCS: Glasgow Coma Score; PTA: Post-Traumatic Amnesia.

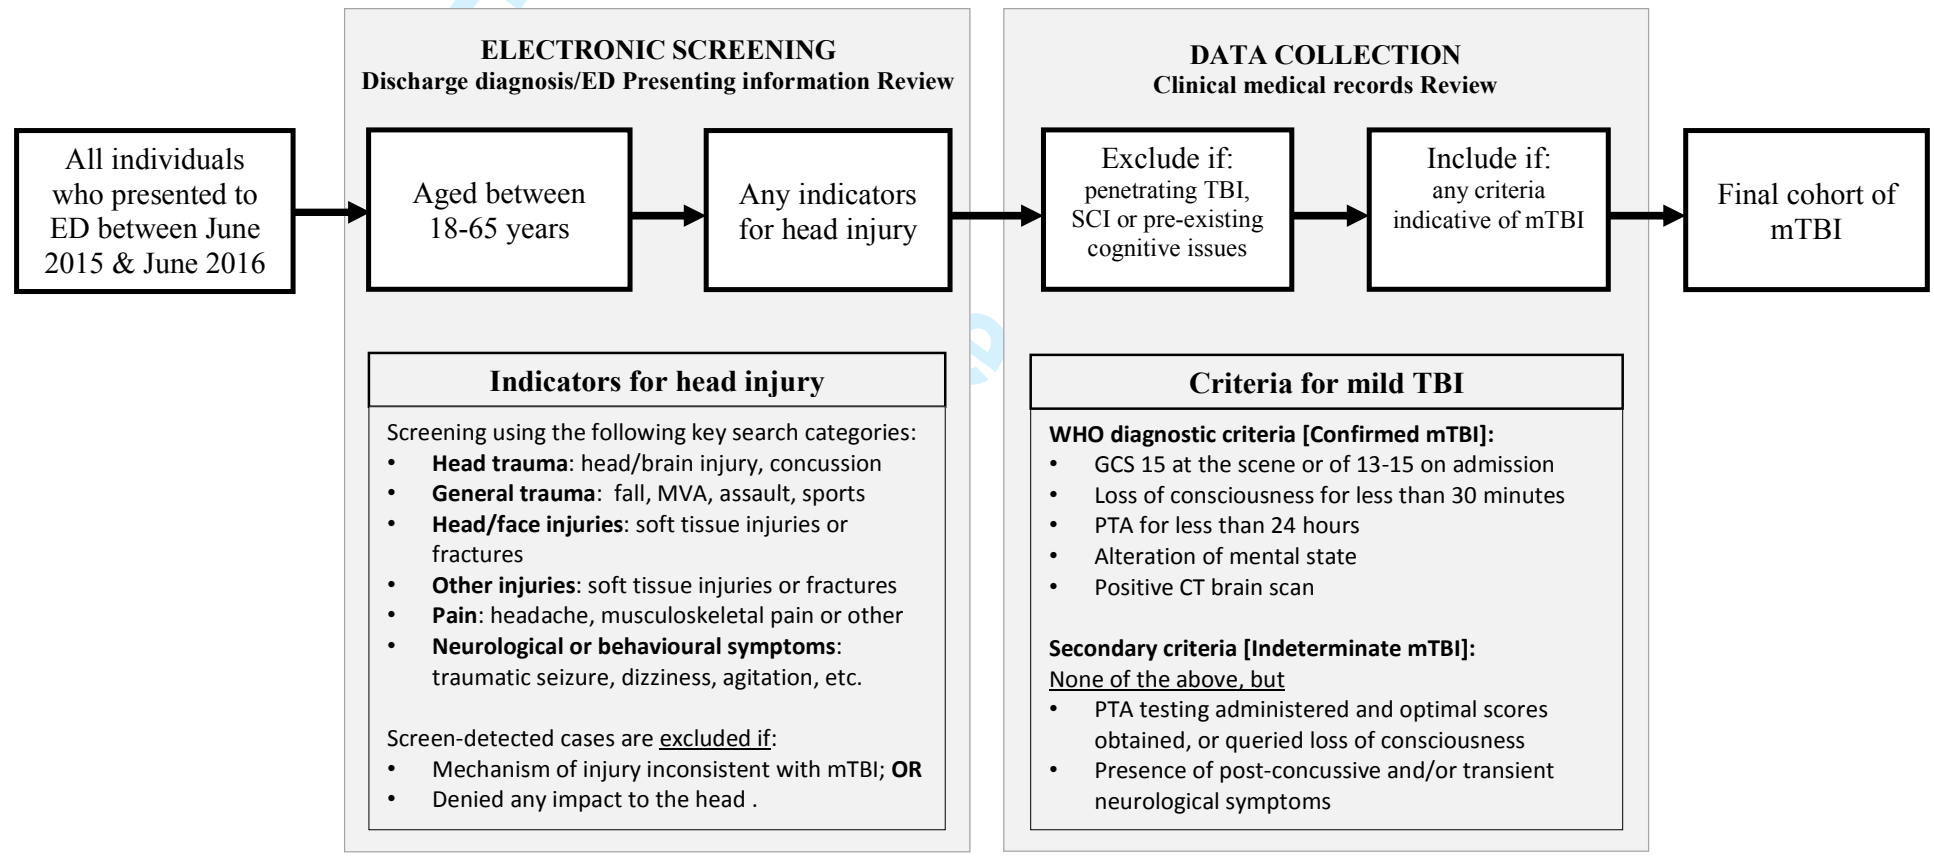

1  
2  
3  
4  
5  
6  
7  
8  
9  
10  
11  
12  
13  
14  
15  
16  
17  
18  
19  
20  
21  
22  
23  
24  
25  
26  
27  
28  
29  
30  
31  
32  
33  
34  
35  
36  
37  
38  
39  
40  
41  
42  
43  
44  
45  
46  
47  
48  
49  
50  
51  
52  
53  
54  
55  
56  
57  
58  
59  
60

For peer review only

# BMJ Open

## A surveillance study to determine the accuracy of mild traumatic brain injury diagnosis in an emergency department: protocol for a retrospective cohort study.

|                                 |                                                                                                                                                                                                                                                                                                                                                                                                                                                                                                                                                                                                     |
|---------------------------------|-----------------------------------------------------------------------------------------------------------------------------------------------------------------------------------------------------------------------------------------------------------------------------------------------------------------------------------------------------------------------------------------------------------------------------------------------------------------------------------------------------------------------------------------------------------------------------------------------------|
| Journal:                        | <i>BMJ Open</i>                                                                                                                                                                                                                                                                                                                                                                                                                                                                                                                                                                                     |
| Manuscript ID                   | bmjopen-2017-016222.R1                                                                                                                                                                                                                                                                                                                                                                                                                                                                                                                                                                              |
| Article Type:                   | Protocol                                                                                                                                                                                                                                                                                                                                                                                                                                                                                                                                                                                            |
| Date Submitted by the Author:   | 22-May-2017                                                                                                                                                                                                                                                                                                                                                                                                                                                                                                                                                                                         |
| Complete List of Authors:       | Pozzato, Ilaria; University of Sydney, Centre for Vision Research<br>Cameron, Ian; University of Sydney, Rehabilitation Studies Unit<br>Meares, Susanne; Macquarie University<br>Kifley, Annette; University of Sydney, Centre for Vision Research<br>Vu, Kim Van; University of Sydney, Centre for Vision Research<br>Liang, Anthony; University of Sydney, Centre for Vision Research<br>Gillett, Mark; University of Sydney, Rehabilitation Studies Unit<br>Craig, Ashley; University of Sydney, Northern Clinical School;<br>Gopinath, Bamini; University of Sydney, Centre for Vision Research |
| <b>Primary Subject Heading</b>: | Epidemiology                                                                                                                                                                                                                                                                                                                                                                                                                                                                                                                                                                                        |
| Secondary Subject Heading:      | Emergency medicine, Neurology, Public health                                                                                                                                                                                                                                                                                                                                                                                                                                                                                                                                                        |
| Keywords:                       | Neurological injury < NEUROLOGY, ACCIDENT & EMERGENCY MEDICINE, EPIDEMIOLOGY                                                                                                                                                                                                                                                                                                                                                                                                                                                                                                                        |
|                                 |                                                                                                                                                                                                                                                                                                                                                                                                                                                                                                                                                                                                     |

SCHOLARONE™  
Manuscripts

only

1  
2  
3 **A surveillance study to determine the accuracy of mild traumatic brain injury diagnosis**  
4  
5 **in an emergency department: protocol for a retrospective cohort study.**  
6  
7

8  
9 Ilaria Pozzato<sup>1</sup>

10  
11 Ian D Cameron<sup>1</sup>

12  
13 Susanne Meares<sup>2</sup>

14  
15 Annette Kifley<sup>1</sup>

16  
17 Kim Van Vu<sup>1</sup>

18  
19 Anthony Liang<sup>1</sup>

20  
21 Mark Gillett<sup>3</sup>

22  
23 Ashley Craig<sup>1</sup>

24  
25 Bamini Gopinath<sup>1</sup>

26  
27  
28  
29 <sup>1</sup> John Walsh Centre for Rehabilitation Research, Sydney Medical School, Kolling Medical  
30 Research Institute, University of Sydney, Sydney, Australia.

31  
32  
33 <sup>2</sup> Department of Psychology, Macquarie University, Sydney, Australia.

34  
35  
36 <sup>3</sup> Emergency Department, Royal North Shore Hospital, Sydney, Australia.

37  
38  
39  
40 Correspondence to:

41  
42 Bamini Gopinath

43  
44 John Walsh Centre for Rehabilitation Research, Kolling Institute

45  
46 Corner Reserve Road & First Avenue, Royal North Shore Hospital

47  
48 St Leonards, NSW 2065, Australia

49  
50 Telephone: 61 2 9926 4995 Fax: 61 2 9926 4045

51  
52 Email: [bamini.gopinath@sydney.edu.au](mailto:bamini.gopinath@sydney.edu.au)

Abstract: 300; Text: 3976; Figures: 1.

For peer review only

1  
2  
3  
4  
5  
6  
7  
8  
9  
10  
11  
12  
13  
14  
15  
16  
17  
18  
19  
20  
21  
22  
23  
24  
25  
26  
27  
28  
29  
30  
31  
32  
33  
34  
35  
36  
37  
38  
39  
40  
41  
42  
43  
44  
45  
46  
47  
48  
49  
50  
51  
52  
53  
54  
55  
56  
57  
58  
59  
60

## ABSTRACT

**Introduction:** Existing literature confirms that a mild traumatic brain injury (mTBI) may result in long-term emotional impacts and, in vulnerable subgroups, cognitive deficits. The accurate diagnosis of mTBI and its written documentation is an important first step towards providing appropriate and timely clinical care. Surveillance studies involving emergency department (ED) and hospital-based data need to be prioritized as these provide incident mTBI estimates. This project will advance existing research by estimating the occurrence of mTBI in an ED and quantifying the accuracy of mTBI diagnoses recorded by ED staff through a comprehensive audit of ED records. The study aims to provide age-specific and sex-specific incidence rates of mTBI in an ED, and describe the characteristics of individuals with a confirmed mTBI diagnosis.

**Methods and analysis:** Retrospective chart reviews (between June 2015 and June 2016) of electronic clinical records from an ED in Sydney (New South Wales, Australia) will be conducted. The study population will include persons aged 18-65 years who attended the ED with any clinical features potentially indicative of mTBI. The WHO operational criteria for the clinical identification of mTBI cases is the presence of: (i) a GCS of 13-15 after 30 minutes post-injury or on presentation to hospital; (ii) one or more of the following: post-traumatic amnesia (PTA) of less than 24 hours' duration, confusion or disorientation, a witnessed loss of consciousness for  $\leq 30$  minutes, and/or positive CT brain scan. We estimate that 30,000 ED attendances will be screened and that a sample size of 500 mTBI cases will be identified during this 1-year period, which will provide high precision of estimation for mTBI incidence in the ED setting .

**Ethics and dissemination:** The study was approved by the Northern Sydney Local Health District ethics committee. Study findings will be disseminated via presentations at national/international conferences, and peer-reviewed journals.



### Strengths and limitations of this study

- Will provide previously unavailable epidemiological data on the number and proportion of patients attending the ED of a major metropolitan Australian hospital with mTBI, and the number and proportion with clear documentation of mTBI in their ED and medical record.
- Study findings may educate ED staff and/or improve clinical practice.
- The current study will determine the incidence of mTBI from an ED in NSW, Australia, and the findings may not generalize to other setting mTBI cases admitted to other EDs, treated by primary healthcare providers (e.g. general practitioners) or where medical attention was not sought will not be captured. This may contribute to an underestimation of population-based mTBI incidence.
- As this is not a prospective study, the availability and accuracy of relevant documented clinical information in ED and medical records is essential to mTBI identification and diagnosis in this study, and inadequacies in this information may limit conclusions about mTBI in some cases.

## INTRODUCTION

A World Health Organization (WHO) review of hospital treated mild traumatic brain injury (mTBI) reported an annual incidence in the range of 100–300/100 000.<sup>1</sup> Because most mTBI is not treated in hospital, the true population incidence of mTBI has been estimated to range between 600/100 000 and 749/100,000 per year.<sup>1,2</sup> Current literature reaffirms that mTBI may result in long-term emotional disorders,<sup>3-5</sup> and, in vulnerable subgroups, cognitive deficits.<sup>6</sup> mTBI is now being recognized as a major health concern.<sup>7</sup> Common post-concussive symptoms associated with but not specific to mTBI are classified as physical (e.g. headache, blurring of vision), behavioral (e.g. irritability, anxiety) and cognitive (e.g. difficulty with memory).<sup>3</sup> Although post-concussive symptoms usually resolve within days or weeks, research literature indicates subjective reporting of physical, cognitive and emotional symptoms for several months or years post-injury.<sup>8-12</sup> Consequences for these individuals may include reduced functional ability, heightened emotional distress, and delayed return to work or school.<sup>13,5, 14</sup> However, early identification and subsequent early intervention such as through education and support for the guided resumption of activities, significantly reduces social morbidity and the severity of post-concussive symptoms.<sup>15</sup> The major limitation of research on mTBI is that it is under-diagnosed and thus under-reported. Not knowing the true incidence and prevalence of mTBI renders it challenging to allocate resources and inform evidence-based health-care planning.<sup>3</sup>

Emergency department (ED) assessment is an important primary point of medical contact for early diagnosis; a key element in the management of mTBI for a significant number of patients.<sup>16-18</sup> However, the accurate clinical identification of patients with mTBI in ED is complicated by variations in the criteria used for diagnosis<sup>19-21</sup>. Furthermore, variations in diagnostic terminology and diagnostic coding make it difficult for mTBI to be identified through an administrative database.<sup>19, 22-24</sup> A prospective cohort study of all patients

1  
2  
3 presenting to an urban academic ED in the US over 6 months,<sup>24</sup> showed that the identification  
4 of mTBI patients using ICD-9 codes assigned on discharge appeared to be inaccurate. These  
5 codes were associated with a significant number of false-positive and false-negative code  
6 assignments. Powell et al.<sup>22</sup> found that despite patients reporting findings that were consistent  
7 with an mTBI diagnosis when interviewed by study personnel, the diagnosis of mTBI was  
8 frequently absent from ED medical records. Instead, it appears that the ED staff focused on  
9 ruling out a more severe brain injury for patients with a likely mechanism for TBI. This  
10 approach perhaps reflected the primary mission of the ED to stabilize and treat serious  
11 injuries, as well as time constraints inherent in ED practice. However, it means that those  
12 persons with no clear clinical signs of mTBI on arrival at ED are more likely not to be  
13 diagnosed.<sup>22</sup>

14  
15  
16  
17  
18  
19  
20  
21  
22  
23  
24  
25  
26  
27 Moreover, Cassidy et al. reported that 24% of people injured in a motor vehicle crash  
28 have a diagnosable mTBI,<sup>7</sup> and the authors concluded that mTBI is a major health concern in  
29 the long-term.<sup>7</sup> Falls and motor vehicle crashes are the leading causes of TBI, however, the  
30 true distribution of injury mechanisms for mTBI is not known. Given the lack of good-quality  
31 published studies on mTBI following motor vehicle crashes, there is an obvious gap in  
32 knowledge in this respect.<sup>3</sup> Currently there is limited empirical evidence as to whether  
33 persons with mTBI are accurately identified and diagnosed in Australian ED records  
34 (including in the largest state of New South Wales, NSW). The urgent need to establish a  
35 reliable surveillance system to monitor and inform evidence-based health-care planning and  
36 effective treatment, prevention, and rehabilitation strategies for mTBI have been repeatedly  
37 emphasized.<sup>2</sup> Hence, this surveillance study will aim to move the research forward in this  
38 area. It will involve an electronic clinical record review employing WHO diagnostic criteria<sup>25</sup>  
39 and secondary criteria previously used by Meares et al.<sup>26</sup> to identify the number of patients  
40 with evidence of mTBI who were seen at an ED of a major Sydney metropolitan hospital.  
41  
42  
43  
44  
45  
46  
47  
48  
49  
50  
51  
52  
53  
54  
55  
56  
57  
58  
59  
60

1  
2  
3 The specific study objectives are: 1) To estimate overall, age-specific and sex-specific mTBI  
4 incidence rates in an ED setting, based on confirmed WHO diagnostic criteria, and based on  
5 suggestive but insufficient or indeterminate evidence using secondary criteria; 2) To assess  
6 the extent to which MTBI cases identified above via chart review are explicitly identified and  
7 documented by ED staff using recorded medical diagnoses and diagnostic codes, and to  
8 characterize the terminology and codes currently being used in these cases; 3) To assess the  
9 proportion of mTBI cases that occurred due to falls, motor vehicle crashes, or other  
10 mechanisms of injury; and 4) To describe sociodemographic, injury-related and admission-  
11 related characteristics of individuals who attended ED with mTBI based on confirmed WHO  
12 diagnostic criteria, and of individuals with suggestive but insufficient or indeterminate  
13 evidence based on secondary criteria. The proposed study will bring us closer to  
14 understanding the scope of mTBI by reporting accurate estimates of its incidence in an ED  
15 setting and identifying limitations in current ED diagnosis, documentation and management  
16 (e.g. assessment, discharge instructions) of mTBI. Therefore, findings from this study have  
17 the potential to improve long-term patient outcomes, inform the use of health resources and  
18 promote management consistency for the mTBI patient population.  
19  
20  
21  
22  
23  
24  
25  
26  
27  
28  
29  
30  
31  
32  
33  
34  
35  
36  
37  
38  
39

## 40 **METHODS**

### 41 **Sample selection**

42  
43 The proposed study will employ a retrospective surveillance system to determine if an mTBI  
44 occurred and a diagnosis was documented by the ED staff. The data source for this study will  
45 be all electronic clinical records that related to ED attendances with or without an associated  
46 hospital admission at Royal North Shore Hospital (RNSH) in metropolitan Sydney (NSW,  
47 Australia) over a 1-year period (between June 2015 and June 2016).  
48  
49  
50  
51  
52  
53  
54  
55  
56  
57  
58  
59  
60

### **Inclusion and exclusion criteria**

The inclusion criteria (see Figure 1) are persons aged 18-65 years who presented to the ED within 24 hours post-injury with any clinical features indicative of mTBI<sup>27</sup> based on the WHO criteria for mTBI<sup>22, 25</sup>: (i) GCS of 13-15 after 30 minutes post-injury or on presentation to hospital; (ii) at least one of the following: post-traumatic amnesia (PTA) of less than 24 hours' duration, confusion or disorientation, a witnessed loss of consciousness for 30 minutes or less, and/or positive CT brain scan, indicating intracranial injuries not requiring neurosurgery.<sup>2, 25, 28</sup> The exclusion criteria include: penetrating brain injury; moderate/severe TBI, spinal cord injury, and pre-existing cognitive impairment.<sup>22, 26</sup> Persons who attended ED with head trauma but did not meet the WHO criteria will be classified as indeterminate mTBI if they meet one of the following secondary criteria: 1) is assessed for PTA and obtains optimal scores (i.e. 18 out of 18) on the Abbreviated Westmead Post-traumatic Amnesia Scale (A-WPTAS);<sup>18</sup> or 2) presents to the ED for post-concussive symptoms,<sup>29</sup> transient neurological deficits or queried loss of consciousness. Although the literature<sup>27</sup> suggests that a diagnosis of mTBI should not be based only on post-injury symptoms, these cases may nevertheless reflect the difficulty in obtaining accurate diagnostic information (i.e. WHO criteria) from ED records, or the mildest injuries, where manifestations of mTBI resolve prior to the arrival of the medical personnel or presentation to hospital.<sup>26</sup> Indeed, these cases are the most difficult to identify.

### **Patient screening and data collection**

An mTBI case identification protocol was developed with input from all investigators. Patient information will be extracted by the research team from the information management system, FirstNet, a module of the Health Electronic Medical Record that is used in NSW (Figure 1). A limitation of FirstNet is that only a principal diagnosis can be recorded and guidelines are

1  
2  
3 not explicit on whether symptoms or a diagnosis is to be entered.<sup>30</sup> If mTBI is the diagnosis  
4 of interest, and the patient is not categorized accordingly they will not be identified through  
5 FirstNet. To increase the accuracy of identifying possible mTBI patients, all ED presentations  
6 meeting study age and interval period will be reviewed by a two-step process (Figure 1).  
7  
8 First, individuals with any possible indicators of mTBI as their discharge diagnosis, will be  
9 identified by the research team, using the following key search categories: 1) a diagnosis of  
10 head trauma, head injury or brain injury; 2) a mechanism of injury consistent with a possible  
11 mTBI (e.g. transport-related accident, assault, or fall); 3) an injury description that includes  
12 head lacerations, bruising, swelling, facial fractures, or other musculoskeletal injuries; and 4)  
13 mTBI-related symptoms, such as pain, neurological or behavioral symptoms. Triage  
14 presenting information will then be reviewed and the individual excluded if the mechanism of  
15 injury is not consistent with mTBI.  
16  
17  
18  
19  
20  
21  
22  
23  
24  
25  
26  
27  
28

29  
30 Second, for the possible cases identified in step 1, a thorough review of all  
31 documentation available in clinical records will confirm if individuals meet the relevant  
32 WHO diagnostic criteria for mTBI and document alcohol and illicit drug usage at the time of  
33 injury.<sup>18, 22, 26</sup> The audit of ED records will help obtain information (if available) regarding  
34 GCS scores, with mTBI defined as a GCS score of 13-15 after 30 minutes post-injury or on  
35 hospital admission. Information from the A-WPTAS, a validated measure of PTA, will also  
36 be collected. This scale includes eye opening, motor and verbal components from the GCS  
37 and a test of ability to recall 3 picture cards to measure amnesia.<sup>18</sup> Other measures, which  
38 will be collected to confirm occurrence of mTBI include: signs of confusion or disorientation;  
39 a witnessed loss of consciousness of 30 minutes or less; and a positive finding from brain CT  
40 scan or skull X-Ray. Lastly, the presence of post-concussive symptoms is also recorded,  
41 whether in isolation (indeterminate mTBI) or in association with other indicators.  
42  
43  
44  
45  
46  
47  
48  
49  
50  
51  
52  
53  
54  
55  
56  
57  
58  
59  
60

1  
2  
3 Two chart auditors (IP and KVV) were trained in study inclusion and exclusion criteria  
4 and case identification, and pilot testing was conducted to work through disagreements or  
5 differences of opinion until the two auditors arrived at a common understanding and were  
6 extracting the same cases at initial screening (percent agreement of 91%). The first stage of  
7 the screening procedure was then assigned to KVV and the second stage to IP, so each step  
8 will be consistently undertaken by the same chart auditor. If the chart auditors are unsure  
9 about a record, all clinical evidence will be referred to and reviewed by the study  
10 investigators (BG, SM) on a weekly basis. The data will be collected using data collection  
11 sheets, and will be subsequently entered into a secure online platform, called Research  
12 Electronic Data Capture (REDCap).  
13  
14  
15  
16  
17  
18  
19  
20  
21  
22  
23  
24

25 The proposed retrospective surveillance system will also allow us to obtain socio-  
26 demographic, injury-related and admission-related data for individuals identified as having  
27 confirmed mTBI based on WHO diagnostic criteria or suggestive but insufficient or  
28 indeterminate evidence based on secondary criteria. These variables will include: postcode,  
29 age, sex, ethnicity date of injury, mechanisms of injury (e.g. motor vehicle crash, falls,  
30 sports-related), and hospital admission status.  
31  
32  
33  
34  
35  
36  
37  
38

39 Further, for the purpose of this study, mTBI-related diagnoses (i.e. brain injury, mTBI,  
40 concussion, post-concussive symptoms or syndrome) listed in the ED medical records and the  
41 assigned diagnostic codes (SNOWMED and ICD-10 codes) will be collected through  
42 retrospective review to determine whether an mTBI diagnosis was documented or not by ED  
43 staff.  
44  
45  
46  
47  
48  
49  
50  
51

## 52 **Sample size**

53 A 1-year audit of clinical and electronic ED records from RNSH will achieve sufficient  
54 numbers. We base this assumption on a previous study by Meares (data not published), which  
55  
56  
57  
58  
59  
60

1  
2  
3 showed that annual patient presentations to another major NSW ED in 2010 were 54473 and  
4  
5 increased in 2011 to 56903. An audit of electronic and clinical medical records indicated that  
6  
7 between April and September 2010, there were 19,084 attendances of individuals aged  
8  
9 between 18 to 65 years of age, and between April and September, 2011 there were 20,024  
10  
11 attendances. The proportion identified with mTBI was 1.1% (n = 228) between April and  
12  
13 September 2010, and between April and September 2011 were 1.3% (n = 252). Hence, in this  
14  
15 study, we estimate that approximately 30,000 ED attendances will be screened and that 500  
16  
17 mTBI cases will be identified from RNSH medical records over a 1-year period. This sample  
18  
19 size provides high precision of estimation of mTBI incidence in the ED setting (95%  
20  
21 confidence intervals of  $\pm 0.2\%$  for the overall point estimate, and  $\pm 1.6\%$  for a study stratum  
22  
23 that includes only 1% of the total sample).  
24  
25  
26  
27  
28

## 29 **Outcomes**

30  
31 The primary outcome measure is mTBI incidence in an ED setting among all patients treated  
32  
33 in RNSH ED over a one year period, based on confirmed WHO diagnostic criteria from ED  
34  
35 records and based on suggestive but indeterminate evidence using secondary criteria.  
36  
37 Secondary outcomes are: 1) the proportion of mTBI cases that occurred as a result of a motor  
38  
39 vehicle crash versus those injured in a fall or sports-related incident; and 2) characterizing the  
40  
41 sociodemographic and other characteristics (e.g. age, sex, ethnicity, hospital admission  
42  
43 status) of individuals attending the ED with an mTBI diagnosis confirmed based on WHO  
44  
45 diagnostic criteria and with suggestive but indeterminate evidence of mTBI based on  
46  
47 secondary criteria 3) characterize whether and how mTBI diagnoses are explicitly noted and  
48  
49 recorded by ED staff, and management of those injuries in the ED setting.  
50  
51  
52  
53  
54  
55

## 56 **Data analysis plan**



1  
2  
3 Demographic and clinical data will be summarized using means and standard deviations for  
4  
5 continuous variables and frequencies or percentages for categorical variables. Overall, age-  
6  
7 specific and sex-specific incidence rates of mTBI over the 1-year period will be calculated  
8  
9 with 95% confidence intervals. While FirstNet allows possible mTBI cases to be identified in  
10  
11 the first instance, an audit of hospital records will allow an identification of mTBI based  
12  
13 on meeting  $\geq 1$  of WHO criteria, and/or secondary criteria. Among ED attendances identified  
14  
15 as involving an mTBI through retrospective chart audit, the accuracy of the ED working  
16  
17 diagnosis, documented by clinicians in the medical records, and the accuracy of diagnostic  
18  
19 coding entered in Systematized Nomenclature of Medicine - Clinical Terms or SNOMED CT  
20  
21 (used within hospital electronic medical records) will be examined. Further, the ICD  
22  
23 diagnoses for in-patient admissions of mTBI will also be compared in separate analyses.  
24  
25 Rates of agreement and misclassification will be quantified and the kappa statistic for  
26  
27 agreement computed.  
28  
29  
30

31 Sociodemographic, injury-related, and admission-related characteristics of mTBI cases  
32  
33 will be described. Analyses will be conducted using SPSS and/or SAS statistical software.  
34  
35  
36

### 37 38 **ETHICS AND DISSEMINATION**

39  
40 The study was approved by the Northern Sydney Local Health District Human Research  
41  
42 Ethics Committee. The committee deemed this study as low risk in terms of ethical issues.  
43  
44 The written papers from this study will be submitted for publication in quality peer-reviewed  
45  
46 medical and health journals. Study findings will also be disseminated via presentations at  
47  
48 local, national and international conferences.  
49  
50

51  
52  
53 **Contributors:** The authors' responsibilities were as follows—BG, IP, IDC, SM, AC, MG,  
54  
55 and AK: study concept and design; IP, KVV, and AL: acquisition of data; BG, IP: drafting of  
56  
57

1  
2  
3 the manuscript; IP, BG, IDC, SM, AC, and KVV: critical revision of the manuscript. All  
4  
5 authors have given final approval of the version to be published.  
6

7 **Funding:** The study is supported by the Ramsay Research and Teaching Fund. IDC is funded  
8  
9 by an Australian National Health and Medical Research Council Practitioner Fellowship.  
10

11 **Competing interests:** None declared.  
12

13  
14 **Ethics and dissemination:** The Northern Sydney Local Health District Human Research  
15  
16 Ethics Committee approved the study (reference: RESP/16/259). Findings will be  
17  
18 disseminated through research conferences and peer-reviewed journals.  
19

20  
21 **Data sharing statement:** Study data will be available on request to BG once the research  
22  
23 team has completed the pre-planned analyses.  
24  
25

## 26 27 REFERENCES

- 28  
29 1. Cassidy JD, Carroll LJ, Peloso PM, et al. Incidence, risk factors and prevention of  
30  
31 mild traumatic brain injury: Results of the WHO Collaborating Centre Task Force on  
32  
33 Mild Traumatic Brain Injury. *J. Rehabil. Med.* Feb 2004;36:28-60.  
34  
35
- 36 2. Feigin VL, Theadom A, Barker-Collo S, et al. Incidence of traumatic brain injury in  
37  
38 New Zealand: a population-based study. *The Lancet. Neurology.* Jan 2013;12(1):53-  
39  
40 64.  
41  
42
- 43 3. Jagnoor J, Cameron I. Mild traumatic brain injury and motor vehicle crashes:  
44  
45 Limitations to our understanding. *Injury.* (0).  
46
- 47 4. Stalnacke BM, Elgh E, Sojka P. One-year follow-up of mild traumatic brain injury:  
48  
49 Cognition disability and life satisfaction of patients seeking consultation. *J. Rehabil.*  
50  
51 *Med.* 2007;39(5):405-411.  
52  
53
- 54 5. Craig A, Tran Y, Guest R, et al. Psychological impact of injuries sustained in motor  
55  
56 vehicle crashes: systematic review and meta-analysis. *BMJ Open.* 2016;6(9):e011993.  
57  
58

- 1  
2  
3 6. Karr JE, Areshenkoff CN, Garcia-Barrera MA. The neuropsychological outcomes of  
4  
5 concussion: a systematic review of meta-analyses on the cognitive sequelae of mild  
6  
7 traumatic brain injury. *Neuropsychology*. May 2014;28(3):321-336.  
8
- 9  
10 7. Cassidy JD, Boyle E, Carroll LJ. Population-based, inception cohort study of the  
11  
12 incidence, course, and prognosis of mild traumatic brain injury after motor vehicle  
13  
14 collisions. *Archives of physical medicine and rehabilitation*. Mar 2014;95(3  
15  
16 Suppl):S278-285.  
17
- 18  
19 8. Mittenberg W, Canary EM, Condit D, Patton C. Treatment of post-concussion  
20  
21 syndrome following mild head injury. *Journal of clinical and experimental*  
22  
23 *neuropsychology*. Dec 2001;23(6):829-836.  
24
- 25  
26 9. Stalnacke BM, Bjornstig U, Karlsson K, Sojka P. One-year follow-up of mild  
27  
28 traumatic brain injury: post-concussion symptoms, disabilities and life satisfaction in  
29  
30 relation to serum levels of S-100B and neurone-specific enolase in acute phase. *J*  
31  
32 *Rehabil Med*. Sep 2005;37(5):300-305.  
33
- 34  
35 10. De Kruijk JR, Leffers P, Menheere PP, Meerhoff S, Rutten J, Twijnstra A. Prediction  
36  
37 of post-traumatic complaints after mild traumatic brain injury: early symptoms and  
38  
39 biochemical markers. *Journal of neurology, neurosurgery, and psychiatry*. Dec  
40  
41 2002;73(6):727-732.  
42
- 43  
44 11. Sterr A, Herron KA, Hayward C, Montaldi D. Are mild head injuries as mild as we  
45  
46 think? Neurobehavioral concomitants of chronic post-concussion syndrome. *BMC*  
47  
48 *neurology*. 2006;6:7.  
49
- 50  
51 12. Silverberg ND, Gardner AJ, Brubacher JR, Panenka WJ, Li JJ, Iverson GL.  
52  
53 Systematic review of multivariable prognostic models for mild traumatic brain injury.  
54  
55 *Journal of neurotrauma*. Apr 15 2015;32(8):517-526.  
56  
57  
58  
59  
60

- 1  
2  
3 13. NSW) MAAoNM. *Guidelines for Mild Traumatic Brain Injury following a Closed*  
4  
5 *Head Injury* 2008.
- 6  
7 14. Jagoda AS, Bazarian JJ, Bruns JJ, Jr., et al. Clinical policy: neuroimaging and  
8  
9 decisionmaking in adult mild traumatic brain injury in the acute setting. *Annals of*  
10  
11 *emergency medicine*. Dec 2008;52(6):714-748.
- 12  
13 15. Dikmen S, McLean A, Temkin N. Neuropsychological and psychosocial  
14  
15 consequences of minor head injury. *Journal of Neurology, Neurosurgery &*  
16  
17 *Psychiatry*. November 1, 1986 1986;49(11):1227-1232.
- 18  
19 16. Bazarian J, Hartman M, Delahunta E. Minor head injury: predicting follow-up after  
20  
21 discharge from the Emergency Department. *Brain Injury*. Mar 2000;14(3):285-294.
- 22  
23 17. Bazarian JJ, McClung J, Cheng YT, Flesher W, Schneider SM. Emergency  
24  
25 department management of mild traumatic brain injury in the USA. *Emerg. Med. J.*  
26  
27 Jul 2005;22(7):473-477.
- 28  
29 18. Meares S, Shores EA, Taylor AJ, Lammél A, Batchelor J. Validation of the  
30  
31 Abbreviated Westmead Post-traumatic Amnesia Scale: A brief measure to identify  
32  
33 acute cognitive impairment in mild traumatic brain injury. *Brain Injury*.  
34  
35 2011;25(12):1198-1205.
- 36  
37 19. Blostein P, Jones SJ. Identification and evaluation of patients with mild traumatic  
38  
39 brain injury: Results of a national survey of level I trauma centers. *Journal of Trauma*  
40  
41 *- Injury, Infection and Critical Care*. 2003;55(3):450-453.
- 42  
43 20. Ruff RM, Jurica P. In search of a unified definition for mild traumatic brain injury.  
44  
45 *Brain Injury*. 1999;13(12):943-952.
- 46  
47 21. Esselman PC, Uomoto JM. Classification of the spectrum of mild traumatic brain  
48  
49 injury. *Brain Injury*. 1995;9(4):417-424.
- 50  
51  
52  
53  
54  
55  
56  
57  
58  
59  
60

- 1  
2  
3  
4  
5  
6  
7  
8  
9  
10  
11  
12  
13  
14  
15  
16  
17  
18  
19  
20  
21  
22  
23  
24  
25  
26  
27  
28  
29  
30  
31  
32  
33  
34  
35  
36  
37  
38  
39  
40  
41  
42  
43  
44  
45  
46  
47  
48  
49  
50  
51  
52  
53  
54  
55  
56  
57  
58  
59  
60
22. Powell JM, Ferraro JV, Dikmen SS, Temkin NR, Bell KR. Accuracy of mild traumatic brain injury diagnosis. *Archives of physical medicine and rehabilitation*. Aug 2008;89(8):1550-1555.
23. Tellier A, Della Malva LC, Cwinn A, Grahovac S, Morrish W, Brennan-Barnes M. Mild head injury: A misnomer. *Brain Injury*. 1999;13(7):463-475.
24. Bazarian JJ, Veazie P, Mookerjee S, Lerner EB. Accuracy of Mild Traumatic Brain Injury Case Ascertainment Using ICD-9 Codes. *Academic Emergency Medicine*. 2006;13(1):31-38.
25. Carroll LJ, Cassidy JD, Holm L, Kraus J, Coronado VG. Methodological issues and research recommendations for mild traumatic brain injury: The WHO Collaborating Centre Task Force on Mild Traumatic Brain Injury. *J Rehabil Med*. Feb 2004;36:113-125.
26. Meares S, Shores EA, Smyth T, Batchelor J, Murphy M, Vukasovic M. Identifying Posttraumatic Amnesia in Individuals With a Glasgow Coma Scale of 15 After Mild Traumatic Brain Injury. *Archives of physical medicine and rehabilitation*. Jan 7 2015.
27. Ruff RM, Iverson GL, Barth JT, Bush SS, Broshek DK. Recommendations for diagnosing a mild traumatic brain injury: a National Academy of Neuropsychology education paper. *Archives of clinical neuropsychology : the official journal of the National Academy of Neuropsychologists*. Feb 2009;24(1):3-10.
28. Carroll LJ, Cassidy JD, Peloso PM, et al. Prognosis for mild traumatic brain injury: results of the WHO Collaborating Centre Task Force on Mild Traumatic Brain Injury. *J Rehabil Med*. Feb 2004(43 Suppl):84-105.
29. Hoffer ME, Szczupak M, Kiderman A, et al. Neurosensory Symptom Complexes after Acute Mild Traumatic Brain Injury. *PloS one*. 2016;11(1):e0146039.

1  
2  
3  
4  
5  
6  
7  
8  
9  
10  
11  
12  
13  
14  
15  
16  
17  
18  
19  
20  
21  
22  
23  
24  
25  
26  
27  
28  
29  
30  
31  
32  
33  
34  
35  
36  
37  
38  
39  
40  
41  
42  
43  
44  
45  
46  
47  
48  
49  
50  
51  
52  
53  
54  
55  
56  
57  
58  
59  
60

30. Liaw ST, Chen HY, Maneze D, Taggart J, Dennis S, Vagholkar S, Bunker J. The Quality of Routinely Collected Data: Using the "Principal Diagnosis" in Emergency Department Databases as an Example. *Electro J Health Info* 2012;7:e1.

For peer review only

1  
2  
3  
4 **FIGURE 1.** Screening and data collection flow chart. Grey boxes indicate study selection  
5 process for identification of mTBI.  
6

7 ED: Emergency Department; TBI: Traumatic Brain Injury; mTBI: Mild Traumatic Brain  
8 Injury; SCI: Spinal Cord Injury; MVA: Motor Vehicle Accident; GCS: Glasgow Coma  
9 Score; PTA: Post-Traumatic Amnesia; CT: Computed Tomography.  
10  
11  
12  
13  
14  
15  
16  
17  
18  
19  
20  
21  
22  
23  
24  
25  
26  
27  
28  
29  
30  
31  
32  
33  
34  
35  
36  
37  
38  
39  
40  
41  
42  
43  
44  
45  
46  
47  
48  
49  
50  
51  
52  
53  
54  
55  
56  
57  
58  
59  
60

For peer review only

1  
2  
3  
4  
5  
6  
7  
8  
9  
10  
11  
12  
13  
14  
15  
16  
17  
18  
19  
20  
21  
22  
23  
24  
25  
26  
27  
28  
29  
30  
31  
32  
33  
34  
35  
36  
37  
38  
39  
40  
41  
42  
43  
44  
45  
46  
47  
48  
49  
50  
51  
52  
53  
54  
55  
56  
57  
58  
59  
60

For peer review only



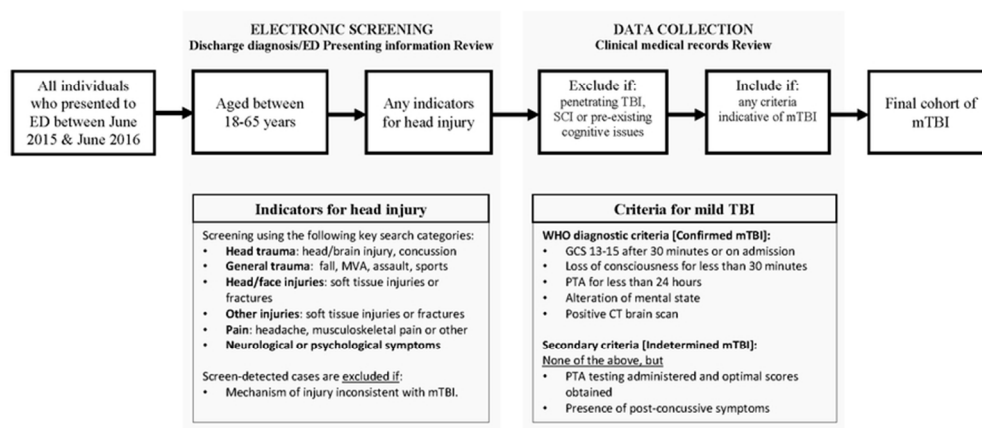

FIGURE 1. Screening and data collection flow chart. Grey boxes indicate study selection process for identification of mTBI.

ED: Emergency Department; TBI: Traumatic Brain Injury; mTBI: Mild Traumatic Brain Injury; SCI: Spinal Cord Injury; MVA: Motor Vehicle Accident; GCS: Glasgow Coma Score; PTA: Post-Traumatic Amnesia; CT: Computed Tomography.

76x33mm (300 x 300 DPI)

# BMJ Open

## A surveillance study to determine the accuracy of mild traumatic brain injury diagnosis in an emergency department: protocol for a retrospective cohort study.

|                                 |                                                                                                                                                                                                                                                                                                                                                                                                                                                                                                                                                                                                     |
|---------------------------------|-----------------------------------------------------------------------------------------------------------------------------------------------------------------------------------------------------------------------------------------------------------------------------------------------------------------------------------------------------------------------------------------------------------------------------------------------------------------------------------------------------------------------------------------------------------------------------------------------------|
| Journal:                        | <i>BMJ Open</i>                                                                                                                                                                                                                                                                                                                                                                                                                                                                                                                                                                                     |
| Manuscript ID                   | bmjopen-2017-016222.R2                                                                                                                                                                                                                                                                                                                                                                                                                                                                                                                                                                              |
| Article Type:                   | Protocol                                                                                                                                                                                                                                                                                                                                                                                                                                                                                                                                                                                            |
| Date Submitted by the Author:   | 28-Jun-2017                                                                                                                                                                                                                                                                                                                                                                                                                                                                                                                                                                                         |
| Complete List of Authors:       | Pozzato, Ilaria; University of Sydney, Centre for Vision Research<br>Cameron, Ian; University of Sydney, Rehabilitation Studies Unit<br>Meares, Susanne; Macquarie University<br>Kifley, Annette; University of Sydney, Centre for Vision Research<br>Vu, Kim Van; University of Sydney, Centre for Vision Research<br>Liang, Anthony; University of Sydney, Centre for Vision Research<br>Gillett, Mark; University of Sydney, Rehabilitation Studies Unit<br>Craig, Ashley; University of Sydney, Northern Clinical School;<br>Gopinath, Bamini; University of Sydney, Centre for Vision Research |
| <b>Primary Subject Heading</b>: | Epidemiology                                                                                                                                                                                                                                                                                                                                                                                                                                                                                                                                                                                        |
| Secondary Subject Heading:      | Emergency medicine, Neurology, Public health                                                                                                                                                                                                                                                                                                                                                                                                                                                                                                                                                        |
| Keywords:                       | Neurological injury < NEUROLOGY, ACCIDENT & EMERGENCY MEDICINE, EPIDEMIOLOGY                                                                                                                                                                                                                                                                                                                                                                                                                                                                                                                        |
|                                 |                                                                                                                                                                                                                                                                                                                                                                                                                                                                                                                                                                                                     |

SCHOLARONE™  
Manuscripts

only

1  
2  
3 **A surveillance study to determine the accuracy of mild traumatic brain injury diagnosis**  
4  
5 **in an emergency department: protocol for a retrospective cohort study.**  
6  
7  
8

9 Ilaria Pozzato<sup>1</sup>

10 Ian D Cameron<sup>1</sup>

11 Susanne Meares<sup>2</sup>

12 Annette Kifley<sup>1</sup>

13 Kim Van Vu<sup>1</sup>

14 Anthony Liang<sup>1</sup>

15 Mark Gillett<sup>3</sup>

16 Ashley Craig<sup>1</sup>

17 Bamini Gopinath<sup>1</sup>

18  
19  
20  
21  
22  
23  
24  
25  
26  
27  
28  
29  
30  
31  
32  
33  
34  
35  
36  
37  
38  
39  
40  
41  
42  
43  
44  
45  
46  
47  
48  
49  
50  
51  
52  
53  
54  
55  
56  
57  
58  
59  
60

<sup>1</sup> John Walsh Centre for Rehabilitation Research, Sydney Medical School, Kolling Medical Research Institute, University of Sydney, Sydney, Australia.

<sup>2</sup> Department of Psychology, Macquarie University, Sydney, Australia.

<sup>3</sup> Emergency Department, Royal North Shore Hospital, Sydney, Australia.

Correspondence to:

Bamini Gopinath

John Walsh Centre for Rehabilitation Research, Kolling Institute

Corner Reserve Road & First Avenue, Royal North Shore Hospital

St Leonards, NSW 2065, Australia

Telephone: 61 2 9926 4995 Fax: 61 2 9926 4045

Email: [bamini.gopinath@sydney.edu.au](mailto:bamini.gopinath@sydney.edu.au)

Abstract: 300; Text: 3976; Figures: 1.

For peer review only

1  
2  
3  
4  
5  
6  
7  
8  
9  
10  
11  
12  
13  
14  
15  
16  
17  
18  
19  
20  
21  
22  
23  
24  
25  
26  
27  
28  
29  
30  
31  
32  
33  
34  
35  
36  
37  
38  
39  
40  
41  
42  
43  
44  
45  
46  
47  
48  
49  
50  
51  
52  
53  
54  
55  
56  
57  
58  
59  
60

## ABSTRACT

**Introduction:** Previous literature confirms that a mild traumatic brain injury (mTBI) may result in long-term emotional impacts and, in vulnerable subgroups, cognitive deficits. The accurate diagnosis of mTBI and its written documentation is an important first step towards providing appropriate and timely clinical care. Surveillance studies involving emergency department (ED) and hospital-based data need to be prioritized as these provide incident mTBI estimates. This project will advance existing research findings by estimating the occurrence of mTBI among those attending an ED and quantifying the accuracy of mTBI diagnoses recorded by ED staff through a comprehensive audit of ED records.

**Methods and analysis:** Retrospective chart reviews (between June 2015 and June 2016) of electronic clinical records from an ED in Sydney (New South Wales, Australia) will be conducted. The study population will include persons aged 18-65 years who attended the ED with any clinical features potentially indicative of mTBI. The World Health Organization (WHO) operational criteria for the clinical identification of mTBI cases is the presence of: (i) a Glasgow Coma Scale (GCS) of 13-15 after 30 minutes post-injury or on presentation to hospital; (ii) one or more of the following: post-traumatic amnesia (PTA) of less than 24 hours' duration, confusion or disorientation, a witnessed loss of consciousness for  $\leq 30$  minutes, and/or a positive computed tomography (CT) brain scan. We estimate that 30,000 ED attendances will be screened and that a sample size of 500 mTBI cases will be identified during this 1-year period, which will provide reliable estimates of mTBI occurrence in the ED setting.

**Ethics and dissemination:** The study was approved by the Northern Sydney Local Health District Ethics Committee. Study findings will be disseminated via presentations at national/international conferences, and peer-reviewed journals.

### Strengths and limitations of this study

- Will provide previously unavailable data on the number and proportion of patients attending the ED of a major metropolitan Australian hospital with mTBI, and the number and proportion with clear documentation of mTBI in their medical records.
- Study findings may educate ED staff and/or improve clinical practice.
- The current study will determine the rates of mTBI diagnosis among ED attendances only, and the findings will not be generalizable to the wider community, as it will not capture those cases treated by primary healthcare providers (e.g. general practitioners) or alternatively where medical attention was not sought, which may contribute to an underestimation of population-based mTBI incidence.
- As this is not a prospective study, the availability and accuracy of relevant documented clinical information in ED medical records is essential to mTBI identification in this study, and inadequacies in this information may limit conclusions about mTBI in some cases.

## INTRODUCTION

A World Health Organization (WHO) review of hospital treated mild traumatic brain injury (mTBI) reported an annual incidence in the range of 100–300/100 000.<sup>1</sup> Because most mTBI is not treated in hospital, the true population incidence of mTBI has been estimated to range between 600/100 000 and 749/100,000 per year.<sup>1,2</sup> Current literature reaffirms that mTBI may result in long-term emotional disorders,<sup>3-5</sup> and, in vulnerable subgroups, cognitive deficits.<sup>6</sup> mTBI is now being recognized as a major health concern.<sup>7</sup> Common post-concussive symptoms associated with but not specific to mTBI, are classified as physical (e.g. headache, blurring of vision), behavioral (e.g. irritability, anxiety) and cognitive (e.g. difficulty with memory).<sup>3</sup> Although post-concussive symptoms usually resolve within days or weeks, research literature indicates subjective reporting of physical, cognitive and emotional symptoms for several months or years post-injury in a subgroup of individuals.<sup>8-12</sup> Consequences for these individuals may include reduced functional ability, heightened emotional distress, and delayed return to work or school.<sup>13,5, 14</sup> However, early identification and subsequent early intervention, such as through education and support for the guided resumption of activities, significantly increases social participation and decreases the severity of post-concussive symptoms.<sup>15</sup> The major limitation of research in this area is that mTBI cases are often under-diagnosed and thus under-reported. Not knowing the true incidence and prevalence of mTBI renders it challenging to allocate resources and inform evidence-based health-care planning.<sup>3</sup>

Emergency department (ED) assessment is an important primary point of medical contact for early diagnosis; a key element in the management of mTBI for a significant number of patients.<sup>16-18</sup> However, an accurate clinical identification of patients with mTBI in ED is complicated by varied criteria used for diagnosis<sup>19-21</sup>. Furthermore, variations in diagnostic terminology and diagnostic coding make it difficult for mTBI to be identified

1  
2  
3 through an administrative database.<sup>19, 22-24</sup> A prospective cohort study of all patients  
4  
5 presenting to an urban academic ED in the US over 6 months,<sup>24</sup> revealed inaccurate  
6  
7 identification of mTBI patients using International Classification of Diseases 9th Revision  
8  
9 criteria (ICD-9 codes) assigned on discharge, . These ICD-9 codes were associated with a  
10  
11 significant number of false-positive and false-negative code assignments. Powell et al.<sup>22</sup>  
12  
13 found that despite patients reporting symptoms consistent with an mTBI diagnosis when  
14  
15 interviewed by study personnel, the diagnosis of mTBI was frequently absent from ED  
16  
17 medical records. Instead, it appears the ED staff were more focused on ruling out severe brain  
18  
19 injury for patients with a likely mechanism for TBI. This approach perhaps reflected the  
20  
21 primary mission of the ED, that is, to stabilize and treat serious injuries, and time constraints  
22  
23 inherent in ED practice may also have influenced findings. However, it was concluded that  
24  
25 persons with a possible mTBI on arrival at ED were more likely not to be diagnosed.<sup>22</sup>  
26  
27  
28

29  
30 Moreover, Cassidy et al. reported that 24% of people injured in a motor vehicle crash  
31  
32 have a diagnosable mTBI,<sup>7</sup> and these authors concluded mTBI to be a major health concern  
33  
34 in the long-term.<sup>7</sup> Falls and motor vehicle crashes are leading causes of TBI, however, the  
35  
36 true distribution of injury mechanisms for mTBI is not known. Given the lack of good-quality  
37  
38 published studies on mTBI following motor vehicle crashes, there is an obvious gap in  
39  
40 knowledge in this respect.<sup>3</sup> Currently there is limited empirical evidence as to whether  
41  
42 persons with mTBI are accurately identified, diagnosed and recorded in Australian ED  
43  
44 records (including in the largest state of New South Wales, NSW). The need to establish a  
45  
46 reliable surveillance system to monitor and inform evidence-based health-care planning and  
47  
48 effective treatment, prevention, and rehabilitation strategies for mTBI has been repeatedly  
49  
50 emphasized.<sup>2</sup> Consequently, this mTBI surveillance study will aim to move the research  
51  
52 forward in this area. It will involve an electronic clinical record review employing WHO  
53  
54 diagnostic criteria<sup>25</sup> and secondary criteria previously used by Meares et al.<sup>26</sup> to identify the  
55  
56  
57  
58  
59  
60



1  
2  
3 number of patients with evidence of mTBI who were seen at an ED of a major Sydney  
4 metropolitan hospital. The study objectives are: 1) To estimate overall, age-specific and sex-  
5 specific occurrence rates of ED attendances with mTBI, using ; 2) To assess the extent to  
6 which mTBI cases identified via chart review are explicitly identified and documented by ED  
7 staff using recorded medical diagnoses and diagnostic codes, and to characterize the  
8 terminology and codes currently being used in these cases; 3) To assess the proportion of  
9 mTBI cases that occur due to falls, motor vehicle crashes, or other mechanisms of injury, and  
10 4) To describe sociodemographic, injury-related and admission-related characteristics of  
11 individuals who attended ED with mTBI based on either confirmed WHO diagnostic criteria,  
12 or on suggestive but insufficient/ indeterminate evidence using secondary criteria. The  
13 proposed study will clarify the nature and scope of mTBI by reporting accurate estimates of  
14 its occurrence in an ED setting as well as identifying limitations in current ED diagnosis,  
15 documentation and management (e.g. assessment, discharge instructions) of mTBI.  
16 Therefore, findings from this study have the potential to improve long-term patient outcomes,  
17 inform the use of health resources and promote management consistency for the mTBI  
18 patient population.  
19  
20  
21  
22  
23  
24  
25  
26  
27  
28  
29  
30  
31  
32  
33  
34  
35  
36  
37  
38  
39

## 40 **METHODS**

### 41 **Sample selection**

42  
43 The proposed study will employ a retrospective surveillance system to determine if an mTBI  
44 occurred and a diagnosis was documented by ED staff. The data source for this study will be  
45 electronic clinical records related to ED attendances with or without an associated hospital  
46 admission at Royal North Shore Hospital (RNSH) over a 1-year period (between June 2015  
47 and June 2016). RNSH is a large hospital in metropolitan Sydney, New South Wales (NSW),  
48 Australia, serving a population of 213,000 inhabitants in 2016, across four local government  
49  
50  
51  
52  
53  
54  
55  
56  
57  
58  
59  
60

1  
2  
3 areas. The overall number of RNSH ED attendances in the study year was approximately  
4  
5 80,000, and of these, 30,000 were aged 18-65 years old.  
6  
7

### 8 9 **Inclusion and exclusion criteria**

10 The inclusion criteria (see Figure 1) are adults aged 18-65 years who presented to the ED  
11  
12 within 24 hours post- injury with any clinical features indicative of mTBI<sup>27</sup> based on the  
13  
14 WHO criteria for mTBI<sup>22, 25</sup> which are: (i) Glasgow Coma Scale (GCS) of 13-15 after 30  
15  
16 minutes post-injury or on presentation to hospital; (ii) at least one of the following: post-  
17  
18 traumatic amnesia (PTA) of less than 24 hours duration, confusion or disorientation, a  
19  
20 witnessed loss of consciousness for 30 minutes or less, and/or positive computed  
21  
22 tomography (CT) brain scan indicating intracranial injuries not requiring neurosurgery.<sup>2, 25, 28</sup>  
23  
24

25 The exclusion criteria include: penetrating brain injury; moderate/severe TBI, spinal cord  
26  
27 injury, and pre-existing cognitive impairment.<sup>22, 26</sup> Persons who attended ED with head  
28  
29 trauma but did not meet the WHO criteria will be classified as indeterminate mTBI if they  
30  
31 meet one of the following secondary criteria : 1) is assessed for PTA and obtains optimal  
32  
33 scores (i.e. 18 out of 18) on the Abbreviated Westmead Post-traumatic Amnesia Scale (A-  
34  
35 WPTAS);<sup>18</sup> or 2) presents to the ED for post-concussive symptoms,<sup>29</sup> transient neurological  
36  
37 deficits or queried loss of consciousness. Although the literature<sup>27</sup> suggests that a diagnosis of  
38  
39 mTBI should not be based only on post-injury symptoms, these cases may nevertheless  
40  
41 reflect the difficulty in obtaining accurate diagnostic information (i.e. WHO criteria) from ED  
42  
43 records, or the mildest injuries, where manifestations of mTBI resolve prior to the arrival of  
44  
45 the medical personnel or presentation to hospital.<sup>26</sup> Indeed, these cases are the most difficult  
46  
47 to identify.  
48  
49  
50  
51  
52

### 53 54 55 **Patient screening and data collection**

1  
2  
3 mTBI case identification protocol was developed with input from all investigators. Patient  
4 information will be extracted by the research team from the information management system,  
5 FirstNet, a module of the Health Electronic Medical Record that is used in NSW (Figure 1).  
6  
7 A limitation of FirstNet is that only a principal diagnosis can be recorded and guidelines are  
8 not explicit on whether symptoms or a diagnosis is to be entered.<sup>30</sup> If mTBI is the diagnosis  
9 of interest, and the patient is not categorized accordingly, they will not be identified through  
10 FirstNet. To increase the accuracy of identifying possible mTBI patients, all ED presentations  
11 meeting study age and interval period will be reviewed by a two-step process (Figure 1).  
12  
13 First, individuals with any possible indicators of mTBI as their discharge diagnosis, will be  
14 identified by the research team, using the following key search categories: 1) a diagnosis of  
15 head trauma, head injury or brain injury; 2) a mechanism of injury consistent with a possible  
16 mTBI (e.g. transport-related accident, assault, or fall); 3) an injury description that includes  
17 head lacerations, bruising, swelling, facial fractures, or other musculoskeletal injuries;  
18 or 4) mTBI-related symptoms, such as pain, neurological or behavioral symptoms. Triage  
19 presenting information will then be reviewed and the individual excluded if there is no  
20 traumatic mechanism involved or if the mechanism of injury is not consistent with mTBI.  
21  
22

23  
24  
25  
26  
27  
28  
29  
30  
31  
32  
33  
34  
35  
36  
37  
38  
39  
40  
41  
42  
43  
44  
45  
46  
47  
48  
49  
50  
51  
52  
53  
54  
55  
56  
57  
58  
59  
60

Second, for the possible cases identified in step 1, a thorough review of all documentation available in clinical records will confirm if individuals meet the relevant WHO diagnostic criteria for mTBI. The review will also document whether alcohol and illicit drug usage was involved in the injury.<sup>18, 22, 26</sup> The audit of ED records will help obtain information (if available) regarding GCS scores, with mTBI defined as a GCS score of 13-15 after 30 minutes post-injury or on hospital admission. Information from the A-WPTAS, a validated measure of PTA, will also be collected. The A-WPTAS scale includes eye opening, motor and verbal components from the GCS and a test of ability to recall three picture cards to measure amnesia.<sup>18</sup> Other measures, which will be collected to confirm occurrence of

1  
2  
3 mTBI, include: signs of confusion or disorientation; a witnessed loss of consciousness of 30  
4  
5 minutes or less; and a positive finding from brain CT scan or skull X-Ray. Lastly, the  
6  
7 presence of post-concussive symptoms is also recorded, whether in isolation (indeterminate  
8  
9 mTBI) or in association with other indicators.  
10

11 Two chart auditors (IP and KVV) have been trained in study inclusion and exclusion  
12  
13 criteria and case identification, and pilot testing conducted to work through disagreements or  
14  
15 differences of opinion until the two auditors arrived at a common understanding and were  
16  
17 extracting the same cases at initial screening (percent agreement of 91%). The first stage of  
18  
19 the screening procedure was then assigned to KVV and the second stage to IP, so each step  
20  
21 will be consistently undertaken by the same chart auditor. If the chart auditors are unsure  
22  
23 about a record, all clinical evidence will be referred to and reviewed by the study  
24  
25 investigators (BG, SM) on a weekly basis. The data will be collected using data collection  
26  
27 sheets, and will be subsequently entered into a secure online platform, called Research  
28  
29 Electronic Data Capture (REDCap).  
30  
31  
32  
33

34 The proposed retrospective surveillance system will also allow us to obtain socio-  
35  
36 demographic, injury-related and admission-related data for individuals identified as having  
37  
38 confirmed mTBI based on either WHO diagnostic criteria or suggestive but insufficient/  
39  
40 indeterminate evidence using secondary criteria. Variables will include: postcode, age, sex,  
41  
42 ethnicity date of injury, mechanisms of injury (e.g. motor vehicle crash, falls, sports-related),  
43  
44 and hospital admission status.  
45  
46

47 Further, for this study, mTBI-related diagnoses (i.e. brain injury, mTBI, concussion,  
48  
49 post-concussive symptoms or syndrome) listed in the ED medical records and the assigned  
50  
51 diagnostic codes (SNOWMED and ICD-10 codes) will be collected through retrospective  
52  
53 review to determine whether an mTBI diagnosis was or was not documented by ED staff.  
54  
55  
56  
57  
58  
59  
60

### Sample size

A 1-year audit of clinical and electronic ED records from RNSH will achieve substantial sample numbers. We base this assumption on a previous study by Meares (data not published), which showed that annual patient presentations to another major NSW ED in 2010 were 54473, increasing in 2011 to 56903. Meares reported in an audit of electronic and clinical medical records that between April and September 2010, there were 19,084 attendances of individuals aged between 18 to 65 years of age, and between April and September 2011 there were 20,024 attendances. The proportion identified with mTBI was 1.1% (n = 228) between April and September 2010, and between April and September 2011 were 1.3% (n = 252). Therefore, for this study, we estimate that approximately 30,000 ED attendances will be screened and that 500 mTBI cases will be identified from RNSH medical records over a 1-year period. This sample size provides high precision of estimation of mTBI incidence in the ED setting (95% confidence intervals of  $\pm 0.2\%$  for the overall point estimate, and  $\pm 1.6\%$  for a study stratum that includes only 1% of the total sample).

### Outcomes

The primary outcome measure is the rate of mTBI diagnosis among ED attendances (aged 18-65 years) at RNSH over a one year period, based on confirmed WHO diagnostic criteria from ED records. Secondary outcomes are: 1) the proportion of mTBI cases that occurred as a result of a motor vehicle crash versus those injured in a fall or sports-related incident; and 2) characterizing the sociodemographic and other characteristics (e.g. age, sex, ethnicity, hospital admission status) of individuals attending the ED with an mTBI diagnosis confirmed based on WHO diagnostic criteria versus suggestive but indeterminate evidence of mTBI using secondary criteria 3) characterize how mTBI diagnoses are noted and recorded by ED staff, and explore the management of those injuries in the ED setting.

### Data analysis plan

Demographic and clinical data will be summarized using means and standard deviations for continuous variables and frequencies or percentages for categorical variables. Overall, age-specific and sex-specific rates of mTBI over the 1-year period will be calculated with 95% confidence intervals. While FirstNet allows possible mTBI cases to be identified in the first instance, an audit of hospital records will allow an identification of mTBI based on meeting  $\geq 1$  of WHO criteria, and/or secondary criteria. Among ED attendances identified as involving an mTBI through retrospective chart audit, the accuracy of the ED working diagnosis, documented by clinicians in the medical records, and the accuracy of diagnostic coding entered in Systematized Nomenclature of Medicine - Clinical Terms or SNOMED CT (used within hospital electronic medical records) will be examined. Further, the ICD diagnoses for in-patient admissions of mTBI will also be compared in separate analyses. Rates of agreement and misclassification will be quantified and the kappa statistic for agreement computed.

Sociodemographic, injury-related, and admission-related characteristics of mTBI cases will be described. Analyses will be conducted using SPSS and/or SAS statistical software.

### ETHICS AND DISSEMINATION

The study was approved by the Northern Sydney Local Health District Human Research Ethics Committee. The committee deemed this study as low risk in terms of ethical issues. The written papers from this study will be submitted for publication in quality peer-reviewed medical and health journals. Study findings will also be disseminated via presentations at local, national and international conferences.

1  
2  
3 **Contributors:** The authors' responsibilities were as follows—BG, IP, IDC, SM, AC, MG,  
4 and AK: study concept and design; IP, KVV, and AL: acquisition of data; BG, IP: drafting of  
5 the manuscript; IP, BG, IDC, SM, AC, and KVV: critical revision of the manuscript. All  
6 authors have given final approval of the version to be published.  
7  
8

9  
10  
11 **Funding:** The study is supported by the Ramsay Research and Teaching Fund. IDC is funded  
12 by an Australian National Health and Medical Research Council Practitioner Fellowship.  
13  
14

15 **Competing interests:** None declared.  
16  
17

18 **Ethics and dissemination:** The Northern Sydney Local Health District Human Research  
19 Ethics Committee approved the study (reference: RESP/16/259). Findings will be  
20 disseminated through research conferences and peer-reviewed journals.  
21  
22

23 **Data sharing statement:** Study data will be available on request to BG once the research  
24 team has completed the pre-planned analyses.  
25  
26  
27  
28  
29  
30  
31

## 32 REFERENCES

- 33  
34 1. Cassidy JD, Carroll LJ, Peloso PM, et al. Incidence, risk factors and prevention of  
35 mild traumatic brain injury: Results of the WHO Collaborating Centre Task Force on  
36 Mild Traumatic Brain Injury. *J. Rehabil. Med.* Feb 2004;36:28-60.  
37  
38
- 39 2. Feigin VL, Theadom A, Barker-Collo S, et al. Incidence of traumatic brain injury in  
40 New Zealand: a population-based study. *The Lancet. Neurology.* Jan 2013;12(1):53-  
41 64.  
42  
43
- 44 3. Jagnoor J, Cameron I. Mild traumatic brain injury and motor vehicle crashes:  
45 Limitations to our understanding. *Injury.* (0).  
46  
47
- 48 4. Stålnacke BM, Elgh E, Sojka P. One-year follow-up of mild traumatic brain injury:  
49 Cognition disability and life satisfaction of patients seeking consultation. *J. Rehabil.*  
50 *Med.* 2007;39(5):405-411.  
51  
52  
53  
54  
55  
56  
57  
58  
59  
60

- 1  
2  
3 5. Craig A, Tran Y, Guest R, et al. Psychological impact of injuries sustained in motor  
4  
5 vehicle crashes: systematic review and meta-analysis. *BMJ Open*. 2016;6(9):e011993.  
6
- 7 6. Karr JE, Areshenkoff CN, Garcia-Barrera MA. The neuropsychological outcomes of  
8  
9 concussion: a systematic review of meta-analyses on the cognitive sequelae of mild  
10  
11 traumatic brain injury. *Neuropsychology*. May 2014;28(3):321-336.  
12
- 13 7. Cassidy JD, Boyle E, Carroll LJ. Population-based, inception cohort study of the  
14  
15 incidence, course, and prognosis of mild traumatic brain injury after motor vehicle  
16  
17 collisions. *Archives of physical medicine and rehabilitation*. Mar 2014;95(3  
18  
19 Suppl):S278-285.  
20
- 21 8. Mittenberg W, Canyock EM, Condit D, Patton C. Treatment of post-concussion  
22  
23 syndrome following mild head injury. *Journal of clinical and experimental*  
24  
25 *neuropsychology*. Dec 2001;23(6):829-836.  
26  
27
- 28 9. Stalnacke BM, Bjornstig U, Karlsson K, Sojka P. One-year follow-up of mild  
29  
30 traumatic brain injury: post-concussion symptoms, disabilities and life satisfaction in  
31  
32 relation to serum levels of S-100B and neurone-specific enolase in acute phase. *J*  
33  
34 *Rehabil Med*. Sep 2005;37(5):300-305.  
35  
36
- 37 10. De Kruijk JR, Leffers P, Menheere PP, Meerhoff S, Rutten J, Twijnstra A. Prediction  
38  
39 of post-traumatic complaints after mild traumatic brain injury: early symptoms and  
40  
41 biochemical markers. *Journal of neurology, neurosurgery, and psychiatry*. Dec  
42  
43 2002;73(6):727-732.  
44  
45
- 46 11. Sterr A, Herron KA, Hayward C, Montaldi D. Are mild head injuries as mild as we  
47  
48 think? Neurobehavioral concomitants of chronic post-concussion syndrome. *BMC*  
49  
50 *neurology*. 2006;6:7.  
51  
52  
53  
54  
55  
56  
57  
58  
59  
60



- 1  
2  
3 12. Silverberg ND, Gardner AJ, Brubacher JR, Panenka WJ, Li JJ, Iverson GL.  
4  
5 Systematic review of multivariable prognostic models for mild traumatic brain injury.  
6  
7 *Journal of neurotrauma*. Apr 15 2015;32(8):517-526.  
8  
9  
10 13. NSW) MAAoNM. *Guidelines for Mild Traumatic Brain Injury following a Closed*  
11  
12 *Head Injury* 2008.  
13  
14 14. Jagoda AS, Bazarian JJ, Bruns JJ, Jr., et al. Clinical policy: neuroimaging and  
15  
16 decisionmaking in adult mild traumatic brain injury in the acute setting. *Annals of*  
17  
18 *emergency medicine*. Dec 2008;52(6):714-748.  
19  
20  
21 15. Dikmen S, McLean A, Temkin N. Neuropsychological and psychosocial  
22  
23 consequences of minor head injury. *Journal of Neurology, Neurosurgery &*  
24  
25 *Psychiatry*. November 1, 1986 1986;49(11):1227-1232.  
26  
27  
28 16. Bazarian J, Hartman M, Delahunta E. Minor head injury: predicting follow-up after  
29  
30 discharge from the Emergency Department. *Brain Injury*. Mar 2000;14(3):285-294.  
31  
32 17. Bazarian JJ, McClung J, Cheng YT, Flesher W, Schneider SM. Emergency  
33  
34 department management of mild traumatic brain injury in the USA. *Emerg. Med. J.*  
35  
36 Jul 2005;22(7):473-477.  
37  
38  
39 18. Meares S, Shores EA, Taylor AJ, Lammél A, Batchelor J. Validation of the  
40  
41 Abbreviated Westmead Post-traumatic Amnesia Scale: A brief measure to identify  
42  
43 acute cognitive impairment in mild traumatic brain injury. *Brain Injury*.  
44  
45 2011;25(12):1198-1205.  
46  
47  
48 19. Blostein P, Jones SJ. Identification and evaluation of patients with mild traumatic  
49  
50 brain injury: Results of a national survey of level I trauma centers. *Journal of Trauma*  
51  
52 *- Injury, Infection and Critical Care*. 2003;55(3):450-453.  
53  
54  
55 20. Ruff RM, Jurica P. In search of a unified definition for mild traumatic brain injury.  
56  
57 *Brain Injury*. 1999;13(12):943-952.  
58  
59  
60

- 1  
2  
3  
4  
5  
6  
7  
8  
9  
10  
11  
12  
13  
14  
15  
16  
17  
18  
19  
20  
21  
22  
23  
24  
25  
26  
27  
28  
29  
30  
31  
32  
33  
34  
35  
36  
37  
38  
39  
40  
41  
42  
43  
44  
45  
46  
47  
48  
49  
50  
51  
52  
53  
54  
55  
56  
57  
58  
59  
60
21. Esselman PC, Uomoto JM. Classification of the spectrum of mild traumatic brain injury. *Brain Injury*. 1995;9(4):417-424.
  22. Powell JM, Ferraro JV, Dikmen SS, Temkin NR, Bell KR. Accuracy of mild traumatic brain injury diagnosis. *Archives of physical medicine and rehabilitation*. Aug 2008;89(8):1550-1555.
  23. Tellier A, Della Malva LC, Cwinn A, Grahovac S, Morrish W, Brennan-Barnes M. Mild head injury: A misnomer. *Brain Injury*. 1999;13(7):463-475.
  24. Bazarian JJ, Veazie P, Mookerjee S, Lerner EB. Accuracy of Mild Traumatic Brain Injury Case Ascertainment Using ICD-9 Codes. *Academic Emergency Medicine*. 2006;13(1):31-38.
  25. Carroll LJ, Cassidy JD, Holm L, Kraus J, Coronado VG. Methodological issues and research recommendations for mild traumatic brain injury: The WHO Collaborating Centre Task Force on Mild Traumatic Brain Injury. *J. Rehabil. Med.* Feb 2004;36:113-125.
  26. Meares S, Shores EA, Smyth T, Batchelor J, Murphy M, Vukasovic M. Identifying Posttraumatic Amnesia in Individuals With a Glasgow Coma Scale of 15 After Mild Traumatic Brain Injury. *Archives of physical medicine and rehabilitation*. Jan 7 2015.
  27. Ruff RM, Iverson GL, Barth JT, Bush SS, Broshek DK. Recommendations for diagnosing a mild traumatic brain injury: a National Academy of Neuropsychology education paper. *Archives of clinical neuropsychology : the official journal of the National Academy of Neuropsychologists*. Feb 2009;24(1):3-10.
  28. Carroll LJ, Cassidy JD, Peloso PM, et al. Prognosis for mild traumatic brain injury: results of the WHO Collaborating Centre Task Force on Mild Traumatic Brain Injury. *J Rehabil Med*. Feb 2004(43 Suppl):84-105.

- 1  
2  
3 29. Hoffer ME, Szczupak M, Kiderman A, et al. Neurosensory Symptom Complexes after  
4  
5 Acute Mild Traumatic Brain Injury. *PloS one*. 2016;11(1):e0146039.  
6  
7  
8 30. Liaw ST, Chen HY, Maneze D, Taggart J, Dennis S, Vagholkar S, Bunker J. The  
9  
10 Quality of Routinely Collected Data: Using the "Principal Diagnosis" in Emergency  
11  
12 Department Databases as an Example. *Electro J Health Info* 2012;7:e1.  
13  
14  
15  
16  
17  
18  
19  
20  
21  
22  
23  
24  
25  
26  
27  
28  
29  
30  
31  
32  
33  
34  
35  
36  
37  
38  
39  
40  
41  
42  
43  
44  
45  
46  
47  
48  
49  
50  
51  
52  
53  
54  
55  
56  
57  
58  
59  
60

For peer review only



FIGURE 1. Screening and data collection flow chart. Grey boxes indicate study selection process for identification of mTBI.

ED: Emergency Department; TBI: Traumatic Brain Injury; mTBI: Mild Traumatic Brain Injury; SCI: Spinal Cord Injury; MVA: Motor Vehicle Accident; GCS: Glasgow Coma Score; PTA: Post-Traumatic Amnesia; CT: Computed Tomography.

76x33mm (300 x 300 DPI)
